# Supplementary material for: Defining essential genes for human pluripotent stem cells by CRISPR–Cas9 screening in haploid cells
Source: Springer Nature journal article supplement (doi:10.1038/s41556-018-0088-1), 2018-04-13
Supplement: MOESM3 [file 41556_2018_88_MOESM3_ESM.xlsx]

## Sheet: new
Ensembl ID	Gene Symbol	CRISPR score	p-value	FDR
ENSG00000000003	TSPAN6	-0.790299	0.235092	0.462896
ENSG00000000005	TNMD	-0.284688	0.202714	0.424691
ENSG00000000419	DPM1	-0.208128	0.101152	0.282348
ENSG00000000457	SCYL3	-0.181916	0.954953	0.978657
ENSG00000000460	C1orf112	-1.4185	0.00760147	0.0526051
ENSG00000000938	FGR	-1.12614	0.00770568	0.0530433
ENSG00000000971	CFH	0.150554	0.131765	0.329249
ENSG00000001036	FUCA2	-0.214263	0.62925	0.788832
ENSG00000001084	GCLC	-0.929153	0.0268428	0.122952
ENSG00000001167	NFYA	-1.38386	0.00767292	0.052898
ENSG00000001460	STPG1	0.482059	0.0368211	0.150957
ENSG00000001461	NIPAL3	0.300809	0.000975296	0.0127738
ENSG00000001497	LAS1L	-1.99755	0.00904636	0.0592843
ENSG00000001561	ENPP4	-0.226379	0.11504	0.304228
ENSG00000001617	SEMA3F	-0.501068	0.696638	0.829415
ENSG00000001626	CFTR	-0.177077	0.29504	0.523868
ENSG00000001629	ANKIB1	-0.269745	0.889122	0.945323
ENSG00000001630	CYP51A1	-0.0767697	0.595255	0.766419
ENSG00000001631	KRIT1	-0.870581	0.568718	0.747538
ENSG00000002016	RAD52	-0.294167	0.36749	0.59085
ENSG00000002330	BAD	-0.0699955	0.276779	0.505375
ENSG00000002549	LAP3	-0.646705	0.717043	0.842053
ENSG00000002586	CD99	-1.02659	0.49636	0.694889
ENSG00000002587	HS3ST1	-0.808486	0.531699	0.721833
ENSG00000002726	AOC1	-0.548717	0.79102	0.887126
ENSG00000002745	WNT16	-0.166652	0.444188	0.654058
ENSG00000002746	HECW1	-0.408068	0.892825	0.946712
ENSG00000002822	MAD1L1	-2.71666	1.9627e-05	0.000787075
ENSG00000002834	LASP1	-1.02296	0.0268892	0.123133
ENSG00000002919	SNX11	-0.498673	0.427285	0.641387
ENSG00000002933	TMEM176A	0.265804	0.0287811	0.128683
ENSG00000003056	M6PR	-0.105988	0.423108	0.638123
ENSG00000003096	KLHL13	-0.348127	0.421073	0.636466
ENSG00000003137	CYP26B1	-0.728623	0.70029	0.831523
ENSG00000003147	ICA1	-0.255122	0.407389	0.625639
ENSG00000003249	DBNDD1	-0.276514	0.615386	0.778939
ENSG00000003393	ALS2	-0.773956	0.317471	0.54463
ENSG00000003400	CASP10	-0.781205	0.350147	0.574594
ENSG00000003402	CFLAR	-0.359535	0.392699	0.611605
ENSG00000003436	TFPI	-0.039327	0.0347593	0.145957
ENSG00000003509	NDUFAF7	-0.490275	0.56575	0.745654
ENSG00000003756	RBM5	-1.16466	0.0973663	0.276835
ENSG00000003987	MTMR7	0.0723044	0.0198215	0.0996555
ENSG00000003989	SLC7A2	-0.61962	0.318325	0.545357
ENSG00000004059	ARF5	-0.531512	0.945802	0.974225
ENSG00000004399	PLXND1	-0.815722	0.11737	0.308292
ENSG00000004455	AK2	0.0299193	0.0153672	0.0842354
ENSG00000004468	CD38	-0.728246	0.990784	0.996587
ENSG00000004478	FKBP4	-0.289641	0.522924	0.716289
ENSG00000004487	KDM1A	-1.78068	0.00176496	0.019176
ENSG00000004534	RBM6	-0.71213	0.572298	0.750369
ENSG00000004660	CAMKK1	-0.22748	0.618977	0.781752
ENSG00000004700	RECQL	-2.97491e-05	0.17471	0.38996
ENSG00000004766	CCDC132	0.223421	0.0454827	0.17242
ENSG00000004776	HSPB6	-0.517596	0.96855	0.985531
ENSG00000004777	ARHGAP33	-0.996798	0.501769	0.699955
ENSG00000004779	NDUFAB1	-2.3692	1.78785e-05	0.000734797
ENSG00000004799	PDK4	-0.0689329	0.0525749	0.189989
ENSG00000004809	SLC22A16	-0.26703	0.371181	0.593616
ENSG00000004838	ZMYND10	-0.347176	0.270889	0.500291
ENSG00000004846	ABCB5	0.0133217	0.0236911	0.112663
ENSG00000004848	ARX	-0.626758	0.980935	0.991804
ENSG00000004864	SLC25A13	-0.120797	0.399987	0.61845
ENSG00000004866	ST7	-0.233989	0.255417	0.484829
ENSG00000004897	CDC27	-1.62824	0.00753012	0.0523842
ENSG00000004939	SLC4A1	-1.75141	0.00380792	0.0326758
ENSG00000004948	CALCR	-0.504121	0.495725	0.694472
ENSG00000004961	HCCS	-0.531322	0.895666	0.947764
ENSG00000004975	DVL2	-0.269272	0.301223	0.530173
ENSG00000005001	PRSS22	-0.251496	0.126739	0.322214
ENSG00000005007	UPF1	-2.06965	0.000654954	0.00964172
ENSG00000005020	SKAP2	0.130332	0.126497	0.322153
ENSG00000005022	SLC25A5	-0.000323164	0.225499	0.451545
ENSG00000005059	CCDC109B	0.0634187	0.23734	0.464903
ENSG00000005073	HOXA11	-0.838579	0.818853	0.903394
ENSG00000005075	POLR2J	-2.58258	5.30693e-06	0.000314025
ENSG00000005100	DHX33	-2.38139	1.48068e-05	0.000652863
ENSG00000005102	MEOX1	-1.15003	0.0783651	0.241873
ENSG00000005108	THSD7A	-0.52499	0.987557	0.995117
ENSG00000005156	LIG3	-1.94236	0.00360821	0.0315583
ENSG00000005175	RPAP3	-1.21967	0.0267149	0.122675
ENSG00000005187	ACSM3	-0.609379	0.924297	0.962839
ENSG00000005194	CIAPIN1	-1.53949	0.0117927	0.0707718
ENSG00000005238	FAM214B	-1.14279	0.0382694	0.154386
ENSG00000005249	PRKAR2B	-0.00671244	0.018398	0.0948135
ENSG00000005302	MSL3	0.594673	0.00481912	0.0383461
ENSG00000005339	CREBBP	-1.64496	0.0239726	0.11367
ENSG00000005379	BZRAP1	-0.715559	0.238114	0.465717
ENSG00000005381	MPO	-0.774543	0.79806	0.891499
ENSG00000005421	PON1	-0.950474	0.0361252	0.149487
ENSG00000005436	GCFC2	-0.0806038	0.280055	0.508087
ENSG00000005448	WDR54	-0.87745	0.286949	0.515652
ENSG00000005469	CROT	-0.0431158	0.0170137	0.0902396
ENSG00000005471	ABCB4	-1.0476	0.00913247	0.0596219
ENSG00000005483	KMT2E	-0.405431	0.951081	0.977145
ENSG00000005486	RHBDD2	-0.171515	0.0986409	0.279043
ENSG00000005513	SOX8	-0.265889	0.0258517	0.11971
ENSG00000005700	IBTK	-0.731493	0.954835	0.978592
ENSG00000005801	ZNF195	-0.082671	0.018927	0.0967378
ENSG00000005812	FBXL3	-0.148603	0.323046	0.550719
ENSG00000005844	ITGAL	-0.368984	0.688606	0.825156
ENSG00000005882	PDK2	-0.36707	0.47486	0.678382
ENSG00000005884	ITGA3	-0.846575	0.178058	0.393465
ENSG00000005889	ZFX	-0.363907	0.689138	0.82548
ENSG00000005893	LAMP2	-0.101182	0.588298	0.761293
ENSG00000005955	GGNBP2	-0.00256671	0.100236	0.280828
ENSG00000005961	ITGA2B	-0.718266	0.290617	0.519313
ENSG00000005981	ASB4	0.00767196	0.10037	0.281031
ENSG00000006007	GDE1	-0.874419	0.0496373	0.182866
ENSG00000006015	C19orf60	0.00311105	0.0800792	0.244943
ENSG00000006016	CRLF1	-0.746125	0.367533	0.59085
ENSG00000006025	OSBPL7	-1.74301	0.00255791	0.0247559
ENSG00000006042	TMEM98	0.427243	0.032903	0.140672
ENSG00000006047	YBX2	-1.46376	0.0814429	0.247677
ENSG00000006059	KRT33A	-0.199704	0.36502	0.588573
ENSG00000006071	ABCC8	-0.130681	0.75262	0.863682
ENSG00000006074	CCL18	0.206328	0.0305684	0.133786
ENSG00000006075	CCL3	0.322114	0.00723133	0.0509757
ENSG00000006114	SYNRG	-0.559575	0.984903	0.993986
ENSG00000006116	CACNG3	-0.457949	0.718931	0.842696
ENSG00000006118	TMEM132A	-0.492762	0.611901	0.776785
ENSG00000006125	AP2B1	-0.485299	0.866398	0.932846
ENSG00000006128	TAC1	-0.151419	0.308705	0.536925
ENSG00000006194	ZNF263	-1.00344	0.10173	0.28318
ENSG00000006210	CX3CL1	-0.795435	0.868183	0.934018
ENSG00000006282	SPATA20	-0.387976	0.897744	0.94855
ENSG00000006283	CACNA1G	-1.31042	0.0417085	0.163046
ENSG00000006327	TNFRSF12A	-0.123314	0.122206	0.316608
ENSG00000006377	DLX6	-0.269049	0.843973	0.918884
ENSG00000006432	MAP3K9	-0.112145	0.694426	0.828078
ENSG00000006451	RALA	0.191726	0.00332208	0.0297746
ENSG00000006453	BAIAP2L1	-0.611875	0.680317	0.821094
ENSG00000006468	ETV1	-0.147474	0.118732	0.310387
ENSG00000006530	AGK	-0.801708	0.363205	0.586792
ENSG00000006555	TTC22	0.246632	0.0363124	0.149887
ENSG00000006576	PHTF2	-0.470483	0.7709	0.875096
ENSG00000006606	CCL26	-0.642261	0.253995	0.4832
ENSG00000006607	FARP2	-1.14902	0.0294378	0.130495
ENSG00000006611	USH1C	-0.772562	0.338745	0.564431
ENSG00000006625	GGCT	0.294741	0.0102443	0.0644202
ENSG00000006634	DBF4	-0.637424	0.738314	0.855699
ENSG00000006638	TBXA2R	-0.577229	0.432285	0.64532
ENSG00000006652	IFRD1	-0.50473	0.677196	0.819549
ENSG00000006659	LGALS14	-0.0709906	0.0697198	0.226129
ENSG00000006695	COX10	-0.971758	0.189404	0.408055
ENSG00000006704	GTF2IRD1	0.0076322	0.178989	0.394506
ENSG00000006712	PAF1	-1.79145	0.015486	0.0847293
ENSG00000006715	VPS41	-1.13163	0.00478428	0.0381692
ENSG00000006740	ARHGAP44	-0.675666	0.260523	0.489427
ENSG00000006744	ELAC2	-2.03301	0.00130925	0.01564
ENSG00000006747	SCIN	-0.312754	0.87778	0.938633
ENSG00000006756	ARSD	-0.64545	0.398637	0.617045
ENSG00000006757	PNPLA4	-0.287367	0.285725	0.514316
ENSG00000006788	MYH13	-0.679883	0.869957	0.934795
ENSG00000006831	ADIPOR2	-0.213162	0.425632	0.640281
ENSG00000006837	CDKL3	-0.0539194	0.354551	0.578469
ENSG00000007001	UPP2	0.632366	0.00331035	0.029726
ENSG00000007038	PRSS21	-0.416699	0.940273	0.971339
ENSG00000007047	MARK4	0.210626	0.0287811	0.128683
ENSG00000007062	PROM1	-0.160757	0.664108	0.812237
ENSG00000007080	CCDC124	-1.0324	0.227194	0.45354
ENSG00000007129	CEACAM21	-0.460433	0.87909	0.939275
ENSG00000007168	PAFAH1B1	-2.2424	1.39295e-07	2.40994e-05
ENSG00000007171	NOS2	-0.31575	0.517645	0.711688
ENSG00000007174	DNAH9	-0.722151	0.318148	0.545321
ENSG00000007202	KIAA0100	-0.648949	0.141148	0.343482
ENSG00000007216	SLC13A2	-0.719982	0.133833	0.332996
ENSG00000007237	GAS7	-0.236925	0.669606	0.815325
ENSG00000007255	TRAPPC6A	-0.496448	0.785333	0.88364
ENSG00000007264	MATK	-1.02174	0.106959	0.291352
ENSG00000007306	CEACAM7	-0.683615	0.454552	0.661859
ENSG00000007312	CD79B	-0.982996	0.263525	0.492155
ENSG00000007314	SCN4A	-1.20858	0.0526843	0.190195
ENSG00000007341	ST7L	-0.449478	0.809088	0.897185
ENSG00000007350	TKTL1	-0.298151	0.108954	0.294488
ENSG00000007372	PAX6	-0.356805	0.414751	0.631506
ENSG00000007376	RPUSD1	-0.489861	0.267962	0.497068
ENSG00000007384	RHBDF1	-1.3629	0.00769344	0.0529993
ENSG00000007392	LUC7L	-0.687289	0.673987	0.817715
ENSG00000007402	CACNA2D2	-0.884446	0.282905	0.510962
ENSG00000007516	BAIAP3	-1.00925	0.186441	0.404044
ENSG00000007520	TSR3	-0.545547	0.176318	0.391468
ENSG00000007541	PIGQ	-1.27077	0.0212357	0.104065
ENSG00000007545	CRAMP1L	0.382642	0.00296104	0.027613
ENSG00000007866	TEAD3	-1.07965	0.0330362	0.141042
ENSG00000007908	SELE	0.33306	0.0330712	0.141159
ENSG00000007923	DNAJC11	-2.04668	0.00181136	0.0195606
ENSG00000007933	FMO3	-0.143203	0.435576	0.647621
ENSG00000007944	MYLIP	-0.405061	0.199129	0.419991
ENSG00000007952	NOX1	-0.726312	0.684349	0.823031
ENSG00000007968	E2F2	-0.468398	0.60183	0.771386
ENSG00000008018	PSMB1	-1.68985	0.00491404	0.0388639
ENSG00000008056	SYN1	-0.844388	0.0865825	0.257579
ENSG00000008083	JARID2	-1.26943	0.0381354	0.154386
ENSG00000008086	CDKL5	-0.172739	0.0068263	0.049067
ENSG00000008118	CAMK1G	-0.227368	0.45397	0.661538
ENSG00000008128	CDK11A	-0.605751	0.340579	0.565696
ENSG00000008130	NADK	-0.548779	0.178005	0.393465
ENSG00000008196	TFAP2B	-1.05637	0.414531	0.631318
ENSG00000008197	TFAP2D	-0.436647	0.261409	0.490522
ENSG00000008226	DLEC1	-0.0990315	0.152296	0.359333
ENSG00000008256	CYTH3	-0.626753	0.412135	0.629549
ENSG00000008277	ADAM22	-0.662956	0.135606	0.335536
ENSG00000008282	SYPL1	0.352538	0.00130889	0.01564
ENSG00000008283	CYB561	-0.243454	0.900438	0.950236
ENSG00000008294	SPAG9	-1.86334	0.00045188	0.00749667
ENSG00000008300	CELSR3	-0.806528	0.21243	0.436813
ENSG00000008311	AASS	0.239364	0.060306	0.206654
ENSG00000008323	PLEKHG6	-0.621713	0.470242	0.675237
ENSG00000008324	SS18L2	-1.98794	0.000425221	0.00720575
ENSG00000008382	MPND	-0.606519	0.655418	0.806989
ENSG00000008394	MGST1	0.00257812	0.111334	0.298258
ENSG00000008405	CRY1	-0.0128023	0.12857	0.324796
ENSG00000008438	PGLYRP1	-0.380204	0.858903	0.928298
ENSG00000008441	NFIX	-0.319183	0.711295	0.838631
ENSG00000008513	ST3GAL1	-0.622814	0.825602	0.907587
ENSG00000008516	MMP25	-0.456833	0.858244	0.927806
ENSG00000008517	IL32	-0.443286	0.887669	0.944608
ENSG00000008710	PKD1	-0.603294	0.610349	0.775991
ENSG00000008838	MED24	-1.16723	0.0918495	0.267094
ENSG00000008853	RHOBTB2	-0.543689	0.790509	0.886717
ENSG00000008869	HEATR5B	-0.259551	0.749178	0.861856
ENSG00000008952	SEC62	-0.311192	0.759752	0.867755
ENSG00000008988	RPS20	-1.52007	0.0120055	0.071576
ENSG00000009307	CSDE1	0.895535	0.00114599	0.014417
ENSG00000009335	UBE3C	0.228746	0.101605	0.283046
ENSG00000009413	REV3L	-2.20405	5.08475e-05	0.0015603
ENSG00000009694	TENM1	-0.560497	0.405231	0.623427
ENSG00000009709	PAX7	-0.971584	0.404903	0.623028
ENSG00000009724	MASP2	-0.392165	0.804248	0.894397
ENSG00000009765	IYD	-0.422306	0.80414	0.894332
ENSG00000009780	FAM76A	0.423622	0.00237466	0.0234701
ENSG00000009790	TRAF3IP3	-0.205185	0.134556	0.33411
ENSG00000009830	POMT2	-0.190841	0.600215	0.770076
ENSG00000009844	VTA1	-0.0271881	0.0948345	0.271858
ENSG00000009950	MLXIPL	-0.524549	0.476437	0.679404
ENSG00000009954	BAZ1B	-0.772302	0.351381	0.575436
ENSG00000010017	RANBP9	-0.68121	0.975505	0.988782
ENSG00000010030	ETV7	-0.590835	0.742887	0.858752
ENSG00000010072	SPRTN	-2.20387	0.00111843	0.0141486
ENSG00000010165	METTL13	-0.588026	0.618998	0.781752
ENSG00000010219	DYRK4	-0.179277	0.131581	0.329071
ENSG00000010244	ZNF207	-0.418071	0.982902	0.99318
ENSG00000010256	UQCRC1	-1.41357	0.00097491	0.0127738
ENSG00000010270	STARD3NL	0.596068	0.00438314	0.0361367
ENSG00000010278	CD9	-0.134095	0.0154042	0.0843379
ENSG00000010282	HHATL	-0.732838	0.777274	0.879201
ENSG00000010292	NCAPD2	-2.43578	0.000466546	0.00768383
ENSG00000010295	IFFO1	0.0218174	0.246133	0.474846
ENSG00000010310	GIPR	-0.0904557	0.587214	0.76092
ENSG00000010318	PHF7	-0.185835	0.678045	0.819986
ENSG00000010319	SEMA3G	0.0570713	0.120376	0.313423
ENSG00000010322	NISCH	0.591775	0.0015228	0.0174091
ENSG00000010327	STAB1	-1.90933	0.00142542	0.0165458
ENSG00000010361	FUZ	0.0636421	0.0288901	0.12898
ENSG00000010379	SLC6A13	0.167459	0.0224308	0.108443
ENSG00000010404	IDS	-0.0820399	0.19407	0.413934
ENSG00000010438	PRSS3	-0.561443	0.538433	0.727037
ENSG00000010539	ZNF200	-0.0307901	0.515773	0.710298
ENSG00000010610	CD4	-0.475969	0.56886	0.747538
ENSG00000010626	LRRC23	-1.2142	0.0311991	0.135817
ENSG00000010671	BTK	-0.776191	0.355372	0.579297
ENSG00000010704	HFE	0.335165	0.00810857	0.0548196
ENSG00000010803	SCMH1	-0.58447	0.205578	0.428518
ENSG00000010810	FYN	-0.167716	0.131692	0.32921
ENSG00000010818	HIVEP2	-0.781006	0.16667	0.379462
ENSG00000010932	FMO1	0.101816	0.157058	0.365502
ENSG00000011007	TCEB3	0.0222915	0.5941	0.765366
ENSG00000011009	LYPLA2	-1.29853	0.149405	0.355518
ENSG00000011021	CLCN6	-1.06445	0.106395	0.290381
ENSG00000011028	MRC2	-0.523882	0.77154	0.875495
ENSG00000011083	SLC6A7	-0.821466	0.187367	0.4053
ENSG00000011105	TSPAN9	0.165363	0.0453921	0.172221
ENSG00000011114	BTBD7	-0.386206	0.262576	0.491588
ENSG00000011132	APBA3	0.128908	0.0701531	0.226722
ENSG00000011143	MKS1	0.0692649	0.125172	0.32144
ENSG00000011198	ABHD5	0.219349	0.0134548	0.0771281
ENSG00000011201	KAL1	-0.679262	0.601559	0.771304
ENSG00000011243	AKAP8L	-1.18844	0.0633711	0.212639
ENSG00000011258	MBTD1	0.973558	3.81508e-05	0.001267
ENSG00000011260	UTP18	-1.16887	0.00250002	0.0243383
ENSG00000011275	RNF216	-0.29635	0.597672	0.76817
ENSG00000011295	TTC19	0.0887968	0.306957	0.535584
ENSG00000011304	PTBP1	-2.82913	1.67401e-07	2.76456e-05
ENSG00000011332	DPF1	-0.200469	0.389397	0.60876
ENSG00000011347	SYT7	-0.411273	0.91216	0.956273
ENSG00000011376	LARS2	-2.18471	4.32603e-08	1.10686e-05
ENSG00000011405	PIK3C2A	-0.254924	0.469998	0.675038
ENSG00000011422	PLAUR	0.0804176	0.268113	0.497197
ENSG00000011426	ANLN	-1.11844	0.334456	0.560543
ENSG00000011451	WIZ	-1.15509	0.0413049	0.162062
ENSG00000011454	RABGAP1	-0.795071	0.829517	0.910142
ENSG00000011465	DCN	-0.36584	0.815341	0.901207
ENSG00000011478	QPCTL	-0.139935	0.15286	0.36007
ENSG00000011485	PPP5C	-0.756385	0.200429	0.421718
ENSG00000011523	CEP68	-1.40894	0.0211415	0.103798
ENSG00000011566	MAP4K3	0.473595	0.000916214	0.0122214
ENSG00000011590	ZBTB32	-0.415665	0.772012	0.875702
ENSG00000011600	TYROBP	0.429729	0.0225966	0.10897
ENSG00000011638	TMEM159	-0.175702	0.214443	0.438888
ENSG00000011677	GABRA3	-0.514809	0.717998	0.842417
ENSG00000012048	BRCA1	-2.15827	1.36262e-05	0.000618834
ENSG00000012061	ERCC1	-1.98704	5.18879e-05	0.00158154
ENSG00000012124	CD22	-0.423823	0.704013	0.833818
ENSG00000012174	MBTPS2	-1.6843	0.0131937	0.0761035
ENSG00000012211	PRICKLE3	-0.269217	0.011297	0.0686541
ENSG00000012223	LTF	-0.0883065	0.361302	0.585175
ENSG00000012232	EXTL3	-1.06834	0.0672394	0.220491
ENSG00000012504	NR1H4	-0.284942	0.474483	0.678154
ENSG00000012660	ELOVL5	0.311154	0.0438846	0.1684
ENSG00000012779	ALOX5	0.00143925	0.410627	0.628376
ENSG00000012817	KDM5D	0.195194	0.0712185	0.228764
ENSG00000012822	CALCOCO1	0.109494	0.00257781	0.0248741
ENSG00000012963	UBR7	-0.292836	0.372453	0.594969
ENSG00000013016	EHD3	-0.55159	0.93894	0.970742
ENSG00000013275	PSMC4	-1.71679	0.00120793	0.0148265
ENSG00000013288	MAN2B2	-0.376075	0.93894	0.970742
ENSG00000013293	SLC7A14	-0.425146	0.3028	0.531928
ENSG00000013297	CLDN11	-0.50808	0.197468	0.417651
ENSG00000013306	SLC25A39	-0.256994	0.347721	0.572462
ENSG00000013364	MVP	-0.655013	0.680974	0.821094
ENSG00000013374	NUB1	-0.687274	0.656854	0.807892
ENSG00000013375	PGM3	-0.582605	0.604745	0.772886
ENSG00000013392	RWDD2A	-0.28878	0.601699	0.771304
ENSG00000013441	CLK1	-0.482077	0.906931	0.953159
ENSG00000013503	POLR3B	-1.73931	0.00518981	0.0405149
ENSG00000013523	ANGEL1	-0.0180141	0.460461	0.666609
ENSG00000013561	RNF14	-0.844731	0.0763759	0.238024
ENSG00000013563	DNASE1L1	-0.45333	0.0722975	0.231266
ENSG00000013573	DDX11	-2.36012	6.62731e-05	0.00190192
ENSG00000013583	HEBP1	-0.065862	0.028043	0.126631
ENSG00000013588	GPRC5A	-0.475611	0.56779	0.747071
ENSG00000013619	MAMLD1	-0.154229	0.412243	0.629576
ENSG00000013725	CD6	-0.462006	0.554466	0.737767
ENSG00000013810	TACC3	-1.92578	3.10176e-05	0.00108151
ENSG00000014123	UFL1	-1.59187	0.000273768	0.0052665
ENSG00000014138	POLA2	-1.55436	0.00983949	0.0625636
ENSG00000014164	ZC3H3	-1.95266	9.42396e-06	0.000480887
ENSG00000014216	CAPN1	-0.190824	0.323849	0.551239
ENSG00000014257	ACPP	-0.795192	0.111602	0.298582
ENSG00000014641	MDH1	0.192059	0.237056	0.464507
ENSG00000014824	SLC30A9	-1.75304	0.00416668	0.0349616
ENSG00000014914	MTMR11	-0.15776	0.682295	0.821594
ENSG00000014919	COX15	-1.61576	0.0158232	0.0858297
ENSG00000015133	CCDC88C	-0.657945	0.778582	0.879907
ENSG00000015153	YAF2	-0.33409	0.575108	0.751882
ENSG00000015171	ZMYND11	-0.399838	0.789978	0.886395
ENSG00000015285	WAS	-0.229095	0.761561	0.868675
ENSG00000015413	DPEP1	-0.806396	0.49975	0.698286
ENSG00000015475	BID	-0.823047	0.37267	0.595037
ENSG00000015479	MATR3	-0.36248	0.967306	0.984915
ENSG00000015520	NPC1L1	-1.30993	0.0470624	0.17704
ENSG00000015532	XYLT2	-1.21809	0.215945	0.440375
ENSG00000015568	RGPD5	-1.24546	0.0436815	0.167956
ENSG00000015592	STMN4	-0.658687	0.31487	0.543103
ENSG00000015676	NUDCD3	-1.09514	0.0228026	0.109701
ENSG00000016082	ISL1	-0.322373	0.862949	0.930732
ENSG00000016391	CHDH	-0.816242	0.628704	0.788516
ENSG00000016402	IL20RA	-0.134387	0.129533	0.32632
ENSG00000016490	CLCA1	-0.205695	0.460231	0.666393
ENSG00000016602	CLCA4	-0.21309	0.697949	0.829882
ENSG00000016864	GLT8D1	-0.854922	0.58721	0.76092
ENSG00000017260	ATP2C1	-1.1434	0.00169472	0.0186345
ENSG00000017373	SRCIN1	-0.695671	0.46943	0.674443
ENSG00000017427	IGF1	-0.0565865	0.173143	0.38831
ENSG00000017483	SLC38A5	-0.710814	0.799083	0.891983
ENSG00000017621	MAGIX	-0.725942	0.451359	0.659385
ENSG00000017797	RALBP1	-0.881454	0.260335	0.489368
ENSG00000018189	RUFY3	0.191603	0.0639677	0.213964
ENSG00000018236	CNTN1	0.107145	0.0802028	0.245198
ENSG00000018280	SLC11A1	-0.937072	0.169963	0.38388
ENSG00000018408	WWTR1	-0.0451049	0.0546929	0.194509
ENSG00000018510	AGPS	-0.365402	0.983591	0.99349
ENSG00000018610	CXorf56	0.115398	0.0262941	0.121278
ENSG00000018625	ATP1A2	-2.10227	0.00140091	0.0163239
ENSG00000018699	TTC27	-2.16286	1.73397e-06	0.000143179
ENSG00000018869	ZNF582	-0.257396	0.41766	0.634595
ENSG00000019102	VSIG2	0.11001	0.0184188	0.0948672
ENSG00000019144	PHLDB1	-0.0329132	0.0333106	0.141714
ENSG00000019169	MARCO	0.249547	0.0795535	0.24378
ENSG00000019186	CYP24A1	-0.414926	0.856331	0.926344
ENSG00000019485	PRDM11	-0.413477	0.88048	0.940041
ENSG00000019505	SYT13	-0.437529	0.896977	0.948164
ENSG00000019549	SNAI2	-0.4277	0.229339	0.456017
ENSG00000019582	CD74	-0.262575	0.900882	0.950484
ENSG00000019991	HGF	-0.541061	0.387603	0.607157
ENSG00000019995	ZRANB1	0.301659	0.0108215	0.066616
ENSG00000020129	NCDN	-1.70882	0.000429183	0.00725935
ENSG00000020181	GPR124	-0.465956	0.874764	0.937188
ENSG00000020256	ZFP64	0.3774	0.00370196	0.0321002
ENSG00000020426	MNAT1	-2.04516	0.000752148	0.0107165
ENSG00000020577	SAMD4A	-0.125821	0.447275	0.656953
ENSG00000020633	RUNX3	-0.101762	0.29371	0.522826
ENSG00000020922	MRE11A	-0.962502	0.00755618	0.0524341
ENSG00000021300	PLEKHB1	0.128269	0.00809671	0.0547598
ENSG00000021355	SERPINB1	-1.35595	0.00750554	0.0522798
ENSG00000021461	CYP3A43	-0.499859	0.947318	0.975279
ENSG00000021488	SLC7A9	-0.437527	0.827654	0.908689
ENSG00000021574	SPAST	-1.1777	0.0178227	0.092791
ENSG00000021645	NRXN3	-0.0394187	0.0121734	0.0721507
ENSG00000021762	OSBPL5	-0.598113	0.868967	0.934394
ENSG00000021776	AQR	-2.85998	2.31631e-08	7.3113e-06
ENSG00000021826	CPS1	0.2755	0.0101303	0.063943
ENSG00000021852	C8B	-0.646063	0.866528	0.932876
ENSG00000022267	FHL1	0.116779	0.0120314	0.07166
ENSG00000022277	RTFDC1	-2.03021	4.17654e-06	0.000265414
ENSG00000022355	GABRA1	-0.113263	0.0545213	0.194203
ENSG00000022556	NLRP2	-1.01609	0.24515	0.473714
ENSG00000022567	SLC45A4	-0.71372	0.26702	0.496284
ENSG00000022840	RNF10	-0.188054	0.563054	0.743832
ENSG00000022976	ZNF839	-1.13576	0.28318	0.511134
ENSG00000023041	ZDHHC6	-0.343245	0.939452	0.970969
ENSG00000023171	GRAMD1B	-0.283364	0.982874	0.99318
ENSG00000023191	RNH1	-2.46579	4.79293e-05	0.00149345
ENSG00000023228	NDUFS1	-0.980117	0.052351	0.189368
ENSG00000023287	RB1CC1	-1.1108	0.378638	0.599943
ENSG00000023318	ERP44	-0.165129	0.263092	0.49179
ENSG00000023330	ALAS1	-0.770573	0.678795	0.820441
ENSG00000023445	BIRC3	0.263728	0.0548985	0.195011
ENSG00000023516	AKAP11	0.0174209	0.0691559	0.225222
ENSG00000023572	GLRX2	-0.359275	0.453032	0.660708
ENSG00000023608	SNAPC1	-1.58566	0.0289917	0.129288
ENSG00000023697	DERA	-0.299656	0.231863	0.458877
ENSG00000023734	STRAP	0.0790286	0.225281	0.451306
ENSG00000023839	ABCC2	-0.999236	0.0739662	0.234211
ENSG00000023892	DEF6	-0.715339	0.490813	0.690712
ENSG00000023902	PLEKHO1	-1.07952	0.0167563	0.0892519
ENSG00000023909	GCLM	-0.0471999	0.0392148	0.156332
ENSG00000024048	UBR2	-0.0421408	0.376524	0.598629
ENSG00000024422	EHD2	-0.0910632	0.399376	0.61782
ENSG00000024526	DEPDC1	0.159128	0.034894	0.146292
ENSG00000024862	CCDC28A	0.0238375	0.207336	0.430174
ENSG00000025039	RRAGD	-0.366343	0.484827	0.686573
ENSG00000025156	HSF2	-0.620839	0.64198	0.797907
ENSG00000025293	PHF20	-1.32463	0.00381264	0.0327008
ENSG00000025423	HSD17B6	0.526309	0.0138918	0.0787883
ENSG00000025434	NR1H3	-0.13673	0.32677	0.554051
ENSG00000025708	TYMP	-0.529844	0.828738	0.909548
ENSG00000025770	NCAPH2	-1.59013	0.00283833	0.0267711
ENSG00000025772	TOMM34	-0.0916233	0.160706	0.370934
ENSG00000025796	SEC63	-1.68249	0.00138278	0.0162253
ENSG00000025800	KPNA6	-0.582429	0.924465	0.962839
ENSG00000026025	VIM	-0.444549	0.520983	0.714493
ENSG00000026103	FAS	-0.61401	0.435438	0.647584
ENSG00000026297	RNASET2	0.328963	0.0760145	0.237919
ENSG00000026508	CD44	0.510414	0.0287557	0.128683
ENSG00000026559	KCNG1	0.151856	0.281897	0.510004
ENSG00000026652	AGPAT4	0.046231	0.121226	0.314782
ENSG00000026751	SLAMF7	-0.0760933	0.195788	0.415907
ENSG00000026950	BTN3A1	-0.356628	0.834416	0.912963
ENSG00000027001	MIPEP	-1.99352	0.00494878	0.0390621
ENSG00000027075	PRKCH	-0.587272	0.347644	0.572462
ENSG00000027644	INSRR	-0.8798	0.0390934	0.156072
ENSG00000027697	IFNGR1	0.355684	0.0104728	0.0653549
ENSG00000027847	B4GALT7	-1.14916	0.0584297	0.202144
ENSG00000027869	SH2D2A	-0.998582	0.328888	0.556209
ENSG00000028116	VRK2	-0.501121	0.91265	0.956534
ENSG00000028137	TNFRSF1B	-0.275013	0.546119	0.731839
ENSG00000028203	VEZT	-1.14018	0.145043	0.349311
ENSG00000028277	POU2F2	-1.17904	0.0503539	0.184464
ENSG00000028310	BRD9	-1.3737	0.00421091	0.0351864
ENSG00000028528	SNX1	-0.398727	0.675139	0.818374
ENSG00000028839	TBPL1	0.691898	0.000102082	0.00263411
ENSG00000029153	ARNTL2	-0.366731	0.69623	0.829196
ENSG00000029363	BCLAF1	-0.627105	0.838628	0.915701
ENSG00000029364	SLC39A9	-0.461132	0.494773	0.693736
ENSG00000029534	ANK1	-0.626609	0.903229	0.951136
ENSG00000029559	IBSP	0.252831	0.00795587	0.0540487
ENSG00000029639	TFB1M	-1.36792	0.0503075	0.184437
ENSG00000029725	RABEP1	-0.542316	0.150803	0.357303
ENSG00000029993	HMGB3	-1.51325	0.0254907	0.118713
ENSG00000030066	NUP160	-2.611	2.66458e-07	3.84164e-05
ENSG00000030110	BAK1	0.443852	0.00640862	0.0469053
ENSG00000030304	MUSK	-0.490375	0.993474	0.997758
ENSG00000030419	IKZF2	-0.365701	0.10149	0.282772
ENSG00000030582	GRN	-0.793231	0.445685	0.655412
ENSG00000031003	FAM13B	-0.841688	0.226409	0.452594
ENSG00000031081	ARHGAP31	-0.294452	0.297069	0.525928
ENSG00000031691	CENPQ	-0.510279	0.429344	0.642566
ENSG00000031698	SARS	-1.94327	7.02137e-05	0.00199297
ENSG00000031823	RANBP3	-1.38724	0.00223188	0.0225591
ENSG00000032219	ARID4A	0.143916	0.0082224	0.0554447
ENSG00000032389	TSSC1	-1.53642	0.00888553	0.0585047
ENSG00000032444	PNPLA6	-1.21637	0.0380701	0.154283
ENSG00000032742	IFT88	0.287929	0.0657358	0.217277
ENSG00000033011	ALG1	-1.40931	0.00269604	0.0257364
ENSG00000033050	ABCF2	-0.0113264	0.176243	0.39135
ENSG00000033100	CHPF2	-0.467786	0.713589	0.839957
ENSG00000033122	LRRC7	-0.288784	0.688814	0.825253
ENSG00000033170	FUT8	0.318857	0.208433	0.43143
ENSG00000033178	UBA6	-0.0165065	0.23346	0.460823
ENSG00000033327	GAB2	-0.156952	0.535159	0.724472
ENSG00000033627	ATP6V0A1	-0.922486	0.0383628	0.154386
ENSG00000033800	PIAS1	0.351244	0.025721	0.119501
ENSG00000033867	SLC4A7	-0.0844482	0.203122	0.425252
ENSG00000034053	APBA2	-0.234255	0.979114	0.990676
ENSG00000034152	MAP2K3	-0.727535	0.703717	0.83363
ENSG00000034239	EFCAB1	0.0893908	0.0636883	0.213422
ENSG00000034510	TMSB10	-0.471361	0.967349	0.984915
ENSG00000034533	ASTE1	0.171522	0.0581994	0.201982
ENSG00000034677	RNF19A	0.0575532	0.0676354	0.221461
ENSG00000034693	PEX3	-0.212894	0.377295	0.599278
ENSG00000034713	GABARAPL2	-0.0762473	0.131603	0.329071
ENSG00000034971	MYOC	-0.754236	0.268102	0.497197
ENSG00000035115	SH3YL1	0.0508186	0.200075	0.421343
ENSG00000035141	FAM136A	-0.577362	0.180754	0.396999
ENSG00000035403	VCL	-1.64732	0.00241833	0.0237724
ENSG00000035499	DEPDC1B	-0.546526	0.791755	0.887567
ENSG00000035664	DAPK2	-0.590801	0.334456	0.560543
ENSG00000035681	NSMAF	-0.207656	0.286873	0.515616
ENSG00000035687	ADSS	-0.222335	0.809466	0.897398
ENSG00000035720	STAP1	0.201183	0.013261	0.076379
ENSG00000035862	TIMP2	0.0765516	0.378792	0.60003
ENSG00000035928	RFC1	-2.00017	0.0009928	0.012947
ENSG00000036054	TBC1D23	-0.858255	0.10033	0.280962
ENSG00000036257	CUL3	-1.62655	0.000926982	0.0122916
ENSG00000036448	MYOM2	0.142615	0.0715417	0.229413
ENSG00000036473	OTC	-0.0648212	0.190016	0.408931
ENSG00000036530	CYP46A1	-0.513561	0.201186	0.422661
ENSG00000036549	ZZZ3	-1.96758	0.000113337	0.00280501
ENSG00000036565	SLC18A1	-0.548315	0.813269	0.899646
ENSG00000036672	USP2	-0.520296	0.657726	0.808571
ENSG00000036828	CASR	-0.753594	0.148171	0.353953
ENSG00000037042	TUBG2	-0.758494	0.169892	0.383864
ENSG00000037241	RPL26L1	-0.296217	0.512836	0.707734
ENSG00000037280	FLT4	-0.916168	0.240563	0.46879
ENSG00000037474	NSUN2	-0.424842	0.119945	0.312658
ENSG00000037637	FBXO42	2.13375	2.84637e-08	8.33986e-06
ENSG00000037749	MFAP3	-0.0705846	0.351058	0.575208
ENSG00000037757	MRI1	-0.508893	0.998715	0.999622
ENSG00000037897	METTL1	-2.33241	0.00013373	0.00317147
ENSG00000037965	HOXC8	-0.107869	0.315398	0.543532
ENSG00000038002	AGA	-0.573721	0.667325	0.813904
ENSG00000038210	PI4K2B	-0.233548	0.438574	0.650326
ENSG00000038219	BOD1L1	-0.567512	0.996983	0.99906
ENSG00000038274	MAT2B	-0.275705	0.559208	0.740832
ENSG00000038295	TLL1	-0.899629	0.168727	0.382373
ENSG00000038358	EDC4	-1.5371	0.00686243	0.0491767
ENSG00000038382	TRIO	-0.890227	0.785258	0.88361
ENSG00000038427	VCAN	-0.763109	0.157431	0.366043
ENSG00000038532	CLEC16A	-0.877518	0.870112	0.934795
ENSG00000038945	MSR1	-0.242708	0.304017	0.53321
ENSG00000039068	CDH1	-0.921103	0.394314	0.613291
ENSG00000039123	SKIV2L2	-1.86258	0.000125735	0.00302378
ENSG00000039139	DNAH5	-0.1624	0.103979	0.286878
ENSG00000039319	ZFYVE16	-0.506727	0.997414	0.999284
ENSG00000039523	FAM65A	-0.34562	0.754908	0.864944
ENSG00000039537	C6	0.0663645	0.0130087	0.0754283
ENSG00000039560	RAI14	-0.182475	0.671071	0.816323
ENSG00000039600	SOX30	-0.190317	0.244636	0.47308
ENSG00000039650	PNKP	-2.90812	1.65255e-06	0.00014094
ENSG00000039987	BEST2	-1.06542	0.0560224	0.197651
ENSG00000040199	PHLPP2	-0.0830432	0.467216	0.673036
ENSG00000040275	SPDL1	-0.619861	0.0871879	0.258524
ENSG00000040341	STAU2	-0.688829	0.784664	0.883269
ENSG00000040487	PQLC2	-0.857917	0.478376	0.680781
ENSG00000040531	CTNS	-0.205326	0.719889	0.843329
ENSG00000040608	RTN4R	-0.602057	0.449416	0.658395
ENSG00000040633	PHF23	-2.17537	0.000143987	0.00334913
ENSG00000040731	CDH10	-0.548487	0.798663	0.891789
ENSG00000040933	INPP4A	-0.785106	0.150432	0.356897
ENSG00000041353	RAB27B	-0.319759	0.942428	0.972312
ENSG00000041357	PSMA4	-0.897	0.426712	0.641162
ENSG00000041515	MYO16	-0.553195	0.763501	0.870082
ENSG00000041802	LSG1	-1.4007	0.0026165	0.0252022
ENSG00000041880	PARP3	-0.840118	0.136823	0.337295
ENSG00000041982	TNC	-1.38731	0.00323894	0.0294075
ENSG00000041988	THAP3	-0.403979	0.11074	0.297721
ENSG00000042062	FAM65C	-0.612657	0.193771	0.413699
ENSG00000042088	TDP1	-0.517191	0.822695	0.905775
ENSG00000042286	AIFM2	0.0589064	0.0067436	0.0487288
ENSG00000042304	C2orf83	-1.13296	0.311778	0.539869
ENSG00000042317	SPATA7	0.156009	0.0177639	0.0926232
ENSG00000042429	MED17	-1.90864	0.000333597	0.00602398
ENSG00000042445	RETSAT	-0.274228	0.892744	0.946681
ENSG00000042493	CAPG	-0.15451	0.165182	0.377494
ENSG00000042753	AP2S1	-0.360286	0.915769	0.95779
ENSG00000042781	USH2A	-0.596338	0.850196	0.922565
ENSG00000042813	ZPBP	-0.830609	0.493488	0.692683
ENSG00000042832	TG	-0.382804	0.434127	0.646529
ENSG00000042980	ADAM28	-0.491138	0.949455	0.976161
ENSG00000043039	BARX2	-0.259845	0.930369	0.966108
ENSG00000043093	DCUN1D1	-0.286638	0.134956	0.334644
ENSG00000043355	ZIC2	-0.996242	0.0457683	0.17325
ENSG00000043462	LCP2	-0.421809	0.640053	0.796524
ENSG00000043514	TRIT1	-1.02179	0.0656592	0.217222
ENSG00000043591	ADRB1	-0.609178	0.951781	0.977451
ENSG00000044012	GUCA2B	-0.496655	0.84262	0.918184
ENSG00000044090	CUL7	-0.815586	0.544427	0.731027
ENSG00000044115	CTNNA1	-2.18333	0.00241048	0.0237209
ENSG00000044446	PHKA2	-0.344533	0.688606	0.825156
ENSG00000044459	CNTLN	-0.378915	0.378693	0.599946
ENSG00000044524	EPHA3	-0.597284	0.614122	0.778342
ENSG00000044574	HSPA5	-3.00484	1.75235e-05	0.000725131
ENSG00000046604	DSG2	0.30507	0.0705268	0.227524
ENSG00000046647	GEMIN8	-1.69693	0.00296977	0.0276337
ENSG00000046651	OFD1	-0.293971	0.703577	0.833614
ENSG00000046653	GPM6B	-0.506381	0.962004	0.982381
ENSG00000046774	MAGEC2	-0.203777	0.150438	0.356897
ENSG00000046889	PREX2	-0.557148	0.798266	0.891579
ENSG00000047056	WDR37	-0.857058	0.0749849	0.235997
ENSG00000047188	YTHDC2	0.115182	0.0101253	0.0639336
ENSG00000047230	CTPS2	-0.546037	0.766357	0.871692
ENSG00000047249	ATP6V1H	-2.1517	0.000176951	0.00385894
ENSG00000047315	POLR2B	-1.64994	0.00060563	0.00919439
ENSG00000047346	FAM214A	0.0289939	0.026691	0.122596
ENSG00000047365	ARAP2	0.0817389	0.0243219	0.114732
ENSG00000047410	TPR	-1.34464	0.00995623	0.0631511
ENSG00000047457	CP	0.0600046	0.104534	0.287662
ENSG00000047578	KIAA0556	-0.617566	0.623034	0.784831
ENSG00000047579	DTNBP1	-0.111122	0.796167	0.890409
ENSG00000047597	XK	-0.0100019	0.0705064	0.227499
ENSG00000047617	ANO2	-0.87659	0.378583	0.599943
ENSG00000047621	C12orf4	-0.140978	0.716554	0.841806
ENSG00000047634	SCML1	-0.247678	0.493104	0.692445
ENSG00000047644	WWC3	-0.854475	0.536963	0.726066
ENSG00000047648	ARHGAP6	0.102074	0.0106461	0.0659088
ENSG00000047662	FAM184B	-0.424022	0.621491	0.783538
ENSG00000047849	MAP4	-0.453799	0.191417	0.41088
ENSG00000047932	GOPC	-0.463411	0.476531	0.679404
ENSG00000047936	ROS1	-0.262872	0.0580599	0.201773
ENSG00000048028	USP28	1.61601	1.60547e-09	1.57055e-06
ENSG00000048052	HDAC9	-0.479195	0.0402785	0.159065
ENSG00000048140	TSPAN17	-0.0330808	0.00836401	0.0561288
ENSG00000048162	NOP16	-2.36006	1.05403e-05	0.000514719
ENSG00000048342	CC2D2A	-0.171874	0.680863	0.821094
ENSG00000048392	RRM2B	-0.359109	0.854327	0.925107
ENSG00000048405	ZNF800	-0.0533559	0.214075	0.438381
ENSG00000048462	TNFRSF17	-0.55427	0.92312	0.962187
ENSG00000048471	SNX29	-0.135254	0.691889	0.826409
ENSG00000048540	LMO3	-0.0336158	0.204279	0.426838
ENSG00000048544	MRPS10	-1.14722	0.0416562	0.162982
ENSG00000048545	GUCA1A	0.00952934	0.453032	0.660708
ENSG00000048649	RSF1	0.0574521	0.00637545	0.0467379
ENSG00000048707	VPS13D	-2.08717	0.000995631	0.0129746
ENSG00000048740	CELF2	-0.385906	0.332496	0.560429
ENSG00000048828	FAM120A	-0.460364	0.852156	0.923754
ENSG00000048991	R3HDM1	0.0807256	0.112881	0.300631
ENSG00000049089	COL9A2	-0.319228	0.0753049	0.236513
ENSG00000049130	KITLG	-0.3147	0.462685	0.668401
ENSG00000049167	ERCC8	-0.0784022	0.418645	0.635241
ENSG00000049192	ADAMTS6	-0.335202	0.661095	0.81083
ENSG00000049239	H6PD	-0.624842	0.754842	0.864944
ENSG00000049245	VAMP3	0.229063	0.0133567	0.0767356
ENSG00000049246	PER3	-0.36664	0.227378	0.4538
ENSG00000049247	UTS2	-0.740264	0.50058	0.69908
ENSG00000049249	TNFRSF9	-0.708102	0.887438	0.944485
ENSG00000049283	EPN3	-1.44028	0.0330847	0.141183
ENSG00000049323	LTBP1	-0.0977261	0.306216	0.535156
ENSG00000049449	RCN1	-0.608958	0.626216	0.78714
ENSG00000049540	ELN	-1.08887	0.581656	0.756794
ENSG00000049541	RFC2	-2.4639	3.23708e-07	4.45491e-05
ENSG00000049618	ARID1B	-0.026479	0.182699	0.399242
ENSG00000049656	CLPTM1L	-0.987562	0.560645	0.741944
ENSG00000049759	NEDD4L	-0.672846	0.160507	0.370723
ENSG00000049768	FOXP3	-0.899882	0.378289	0.59978
ENSG00000049769	PPP1R3F	-0.928891	0.215925	0.440375
ENSG00000049860	HEXB	-0.114384	0.208976	0.432079
ENSG00000049883	PTCD2	-0.511011	0.25659	0.485797
ENSG00000050030	KIAA2022	-0.625382	0.572725	0.750496
ENSG00000050130	JKAMP	-0.0551943	0.12772	0.323457
ENSG00000050165	DKK3	-0.333183	0.528158	0.719328
ENSG00000050327	ARHGEF5	-0.2741	0.30058	0.529616
ENSG00000050344	NFE2L3	0.441339	0.0126332	0.0739629
ENSG00000050393	MCUR1	-0.503532	0.703577	0.833614
ENSG00000050405	LIMA1	-0.232014	0.392297	0.611399
ENSG00000050426	LETMD1	-0.0927315	0.0357435	0.148415
ENSG00000050438	SLC4A8	-0.743062	0.74564	0.860133
ENSG00000050555	LAMC3	-0.607151	0.593389	0.764721
ENSG00000050628	PTGER3	-0.13328	0.00891195	0.058615
ENSG00000050730	TNIP3	-0.452903	0.868136	0.934018
ENSG00000050748	MAPK9	0.00323849	0.0409024	0.160987
ENSG00000050767	COL23A1	-0.838751	0.483739	0.685621
ENSG00000050820	BCAR1	-0.842559	0.668517	0.814561
ENSG00000051009	FAM160A2	-0.809131	0.659436	0.809844
ENSG00000051108	HERPUD1	0.176961	0.0775468	0.240284
ENSG00000051128	HOMER3	-0.31819	0.458682	0.66505
ENSG00000051180	RAD51	-1.81224	0.00133285	0.0158713
ENSG00000051341	POLQ	-0.753001	0.689435	0.825514
ENSG00000051382	PIK3CB	-0.204877	0.577341	0.753501
ENSG00000051523	CYBA	-0.271192	0.48703	0.688555
ENSG00000051596	THOC3	-1.99966	0.00599904	0.0449396
ENSG00000051620	HEBP2	-0.425593	0.973945	0.988087
ENSG00000051825	MPHOSPH9	-0.61626	0.0978185	0.277563
ENSG00000052126	PLEKHA5	-0.560449	0.635729	0.793449
ENSG00000052344	PRSS8	-0.31378	0.612467	0.777161
ENSG00000052723	SIKE1	0.0881027	0.0158084	0.0858267
ENSG00000052749	RRP12	-2.77576	9.25544e-08	1.86816e-05
ENSG00000052795	FNIP2	-0.56973	0.360993	0.584891
ENSG00000052802	MSMO1	-2.52812	2.40985e-05	0.000902624
ENSG00000052841	TTC17	-0.550216	0.906597	0.953159
ENSG00000052850	ALX4	-0.563969	0.155578	0.36369
ENSG00000053108	FSTL4	-0.238139	0.582965	0.757673
ENSG00000053254	FOXN3	-1.171	0.0126263	0.0739629
ENSG00000053328	METTL24	0.635393	0.000297438	0.00560504
ENSG00000053371	AKR7A2	-0.270024	0.828237	0.909218
ENSG00000053372	MRTO4	-1.43799	0.00303597	0.0280955
ENSG00000053438	NNAT	-0.474269	0.777622	0.87937
ENSG00000053501	USE1	-1.57819	1.28889e-05	0.000595649
ENSG00000053524	MCF2L2	0.00402522	0.111187	0.298248
ENSG00000053702	NRIP2	-0.335612	0.678394	0.820159
ENSG00000053747	LAMA3	-0.816399	0.59597	0.767068
ENSG00000053770	AP5M1	-0.171425	0.80833	0.896796
ENSG00000053900	ANAPC4	-2.9895	2.32825e-07	3.52459e-05
ENSG00000053918	KCNQ1	-0.385292	0.177823	0.39345
ENSG00000054116	TRAPPC3	-1.17496	0.0496613	0.182886
ENSG00000054118	THRAP3	-1.14492	0.167197	0.380231
ENSG00000054148	PHPT1	-0.220311	0.502384	0.700337
ENSG00000054179	ENTPD2	-0.982071	0.346275	0.571287
ENSG00000054219	LY75	-0.0815286	0.300562	0.529616
ENSG00000054267	ARID4B	-0.453712	0.9231	0.962187
ENSG00000054277	OPN3	-0.178738	0.0859598	0.256706
ENSG00000054282	SDCCAG8	-0.467763	0.859748	0.928791
ENSG00000054356	PTPRN	0.323574	0.0241809	0.114215
ENSG00000054392	HHAT	0.0685419	0.319137	0.546259
ENSG00000054523	KIF1B	0.033166	0.312128	0.540319
ENSG00000054598	FOXC1	0.155912	0.0271226	0.123796
ENSG00000054611	TBC1D22A	-0.270169	0.401039	0.619497
ENSG00000054654	SYNE2	-0.197978	0.17353	0.388508
ENSG00000054690	PLEKHH1	-0.915641	0.0328242	0.14041
ENSG00000054793	ATP9A	-1.07523	0.196966	0.417124
ENSG00000054796	SPO11	-0.117112	0.245183	0.473728
ENSG00000054803	CBLN4	0.0725191	0.121331	0.31496
ENSG00000054938	CHRDL2	-0.989226	0.196196	0.416463
ENSG00000054965	FAM168A	-1.37139	0.0209983	0.103488
ENSG00000054967	RELT	-0.263114	0.618832	0.781752
ENSG00000054983	GALC	0.195934	0.0291693	0.129843
ENSG00000055044	NOP58	-2.8121	2.08019e-08	7.25616e-06
ENSG00000055070	SZRD1	-1.5406	0.00188058	0.0201194
ENSG00000055118	KCNH2	-0.589484	0.434294	0.64661
ENSG00000055130	CUL1	-1.67854	0.0047343	0.0379605
ENSG00000055147	FAM114A2	0.00665021	0.108938	0.294488
ENSG00000055208	TAB2	-0.325622	0.237266	0.464858
ENSG00000055211	GINM1	-0.243649	0.107861	0.29256
ENSG00000055332	EIF2AK2	-0.501113	0.94172	0.97206
ENSG00000055483	USP36	-2.73006	2.07247e-09	1.88243e-06
ENSG00000055609	KMT2C	-1.41872	0.0619923	0.20979
ENSG00000055732	MCOLN3	-0.102309	0.0732194	0.232943
ENSG00000055813	CCDC85A	-0.57586	0.762444	0.8693
ENSG00000055917	PUM2	-0.400319	0.700955	0.831937
ENSG00000055950	MRPL43	-1.52566	0.00105195	0.0135423
ENSG00000055955	ITIH4	-0.212725	0.206726	0.429799
ENSG00000055957	ITIH1	-0.483428	0.893862	0.947033
ENSG00000056050	C4orf27	-0.0595509	0.276865	0.50547
ENSG00000056097	ZFR	-1.86688	0.000104987	0.00267047
ENSG00000056277	ZNF280C	0.395249	0.00562025	0.0428801
ENSG00000056291	NPFFR2	-0.0589894	0.289372	0.51811
ENSG00000056487	PHF21B	-0.496192	0.983432	0.993384
ENSG00000056558	TRAF1	-0.589591	0.932397	0.967478
ENSG00000056586	RC3H2	-0.486314	0.03213	0.138547
ENSG00000056661	PCGF2	-0.909789	0.0891902	0.262428
ENSG00000056736	IL17RB	-0.267263	0.51079	0.706166
ENSG00000056972	TRAF3IP2	0.243768	0.066147	0.2182
ENSG00000056998	GYG2	0.198857	0.0464854	0.175453
ENSG00000057019	DCBLD2	-0.722175	0.785694	0.883694
ENSG00000057149	SERPINB3	0.360645	0.0139907	0.0792059
ENSG00000057252	SOAT1	-0.862531	0.0583935	0.202144
ENSG00000057294	PKP2	0.0246955	0.207892	0.43077
ENSG00000057468	MSH4	-0.438518	0.995615	0.998511
ENSG00000057593	F7	-0.0694507	0.0582198	0.20199
ENSG00000057608	GDI2	-0.10609	0.0519647	0.188346
ENSG00000057657	PRDM1	-0.557653	0.688546	0.825156
ENSG00000057663	ATG5	-0.408679	0.838041	0.91528
ENSG00000057704	TMCC3	0.270749	0.00133915	0.0159009
ENSG00000057757	PITHD1	-0.241991	0.126854	0.322325
ENSG00000057935	MTA3	-1.45247	0.00251857	0.0244796
ENSG00000058056	USP13	-0.128179	0.128133	0.324052
ENSG00000058063	ATP11B	-0.588929	0.9425	0.972312
ENSG00000058085	LAMC2	-0.874989	0.396451	0.615307
ENSG00000058091	CDK14	0.291201	0.0519007	0.188183
ENSG00000058262	SEC61A1	-2.60823	3.58886e-07	4.77386e-05
ENSG00000058272	PPP1R12A	-1.75761	2.20002e-05	0.000853529
ENSG00000058335	RASGRF1	0.14899	0.0622196	0.210442
ENSG00000058404	CAMK2B	0.405798	0.000383657	0.00668217
ENSG00000058453	CROCC	-2.36645	0.000127391	0.00305056
ENSG00000058600	POLR3E	-2.69225	1.17333e-06	0.000113982
ENSG00000058668	ATP2B4	-0.877649	0.187615	0.405594
ENSG00000058673	ZC3H11A	-0.927671	0.160995	0.371241
ENSG00000058729	RIOK2	-1.77974	4.74727e-07	5.98882e-05
ENSG00000058799	YIPF1	0.191278	0.156133	0.364283
ENSG00000058804	NDC1	-0.689333	0.221969	0.446871
ENSG00000058866	DGKG	-0.721356	0.97962	0.990911
ENSG00000059122	FLYWCH1	-1.46361	0.0719141	0.230404
ENSG00000059145	UNKL	-0.633248	0.183638	0.400495
ENSG00000059377	TBXAS1	0.255941	0.0492718	0.181949
ENSG00000059378	PARP12	-0.436299	0.750586	0.862547
ENSG00000059573	ALDH18A1	-0.240556	0.360966	0.584891
ENSG00000059588	TARBP1	-0.596931	0.493666	0.692773
ENSG00000059691	PET112	-2.21907	5.90088e-05	0.00173445
ENSG00000059728	MXD1	-0.407906	0.349447	0.574018
ENSG00000059758	CDK17	0.251868	0.0167049	0.0890699
ENSG00000059769	DNAJC25	0.075044	0.0125676	0.0736697
ENSG00000059804	SLC2A3	-0.0103113	0.0373349	0.152342
ENSG00000059915	PSD	-0.375478	0.826934	0.908447
ENSG00000060069	CTDP1	-1.4644	0.00365175	0.0318325
ENSG00000060138	YBX3	-0.997165	0.661527	0.810938
ENSG00000060140	STYK1	0.384879	0.00235047	0.0233743
ENSG00000060237	WNK1	-0.123931	0.769617	0.873959
ENSG00000060339	CCAR1	-2.17504	0.000239709	0.00482231
ENSG00000060491	OGFR	-0.544249	0.796007	0.890355
ENSG00000060558	GNA15	-0.221161	0.483409	0.685504
ENSG00000060566	CREB3L3	-0.956085	0.224263	0.449778
ENSG00000060642	PIGV	-1.81221	0.000163987	0.00365964
ENSG00000060656	PTPRU	0.0136748	0.178195	0.393663
ENSG00000060688	SNRNP40	-2.15681	0.0003334	0.00602398
ENSG00000060709	RIMBP2	-0.372599	0.523622	0.716666
ENSG00000060718	COL11A1	-0.362123	0.755633	0.865227
ENSG00000060749	QSER1	-0.279857	0.533585	0.723421
ENSG00000060762	MPC1	0.0854558	0.121638	0.315623
ENSG00000060971	ACAA1	-0.356488	0.651942	0.805274
ENSG00000060982	BCAT1	-0.389027	0.835973	0.913791
ENSG00000061273	HDAC7	-0.562806	0.930179	0.965988
ENSG00000061337	LZTS1	-0.174401	0.262781	0.491654
ENSG00000061455	PRDM6	-0.839945	0.52586	0.717984
ENSG00000061492	WNT8A	-0.319386	0.670311	0.815816
ENSG00000061656	SPAG4	0.44892	0.00344232	0.0305189
ENSG00000061676	NCKAP1	-0.950083	0.263036	0.49179
ENSG00000061794	MRPS35	-2.15408	0.000256161	0.00504709
ENSG00000061918	GUCY1B3	0.268978	0.00597483	0.0448137
ENSG00000061936	SFSWAP	-1.74632	0.00429188	0.0356011
ENSG00000061938	TNK2	-0.960929	0.106949	0.291352
ENSG00000061987	MON2	-0.455131	0.277015	0.505591
ENSG00000062038	CDH3	-1.2326	0.199705	0.420814
ENSG00000062096	ARSF	-0.250431	0.242167	0.470553
ENSG00000062194	GPBP1	-1.00534	0.0538439	0.192963
ENSG00000062282	DGAT2	-0.90022	0.394574	0.613632
ENSG00000062485	CS	-0.997749	0.069379	0.225665
ENSG00000062524	LTK	-0.479619	0.917849	0.959298
ENSG00000062582	MRPS24	-1.67319	0.00181655	0.0195756
ENSG00000062598	ELMO2	-0.558598	0.624476	0.785774
ENSG00000062650	WAPAL	-2.1389	8.21289e-06	0.000437523
ENSG00000062716	VMP1	-1.87173	0.000743278	0.0106234
ENSG00000062725	APPBP2	-0.0579596	0.423199	0.638123
ENSG00000062822	POLD1	-1.90614	0.000761071	0.0107744
ENSG00000063015	SEZ6	-0.579025	0.0685941	0.223673
ENSG00000063046	EIF4B	-1.67371	0.00266466	0.0255711
ENSG00000063127	SLC6A16	-0.166195	0.170328	0.384418
ENSG00000063169	GLTSCR1	-0.881964	0.272196	0.501705
ENSG00000063176	SPHK2	-0.630571	0.678706	0.820426
ENSG00000063177	RPL18	-2.19431	0.000299796	0.00564361
ENSG00000063180	CA11	-0.31047	0.335799	0.561965
ENSG00000063241	ISOC2	-0.638496	0.733356	0.852502
ENSG00000063244	U2AF2	-1.39494	0.0015408	0.0175377
ENSG00000063245	EPN1	-0.451969	0.956194	0.979542
ENSG00000063322	MED29	-0.673504	0.198335	0.418851
ENSG00000063438	AHRR	-0.808999	0.537074	0.726087
ENSG00000063515	GSC2	-0.901542	0.231487	0.458382
ENSG00000063601	MTMR1	-0.3475	0.908414	0.954108
ENSG00000063660	GPC1	-0.264763	0.0241532	0.114173
ENSG00000063761	ADCK1	0.0814245	0.0866408	0.257678
ENSG00000063854	HAGH	-0.0370293	0.693449	0.827383
ENSG00000063978	RNF4	-1.6135	3.27299e-05	0.00113036
ENSG00000064012	CASP8	-0.709453	0.456914	0.663652
ENSG00000064042	LIMCH1	-0.874898	0.0825004	0.250075
ENSG00000064102	ASUN	-1.65536	0.00253171	0.024581
ENSG00000064115	TM7SF3	-0.722383	0.14604	0.350968
ENSG00000064195	DLX3	0.186299	0.0029382	0.0274564
ENSG00000064199	SPA17	0.215073	0.00198749	0.0208698
ENSG00000064201	TSPAN32	-0.164092	0.372365	0.59488
ENSG00000064205	WISP2	-0.436911	0.899684	0.949673
ENSG00000064218	DMRT3	0.338323	0.00761306	0.052626
ENSG00000064225	ST3GAL6	0.339494	0.0478746	0.178728
ENSG00000064270	ATP2C2	-0.348531	0.738983	0.855982
ENSG00000064300	NGFR	0.298103	0.0530998	0.191277
ENSG00000064309	CDON	-0.24892	0.257022	0.48626
ENSG00000064313	TAF2	-1.4135	0.00105912	0.013578
ENSG00000064419	TNPO3	-1.43756	0.111964	0.299065
ENSG00000064490	RFXANK	-0.765761	0.276332	0.505236
ENSG00000064545	TMEM161A	-0.639419	0.671199	0.816323
ENSG00000064547	LPAR2	0.463707	0.0157199	0.0855249
ENSG00000064601	CTSA	-0.301913	0.892545	0.946635
ENSG00000064607	SUGP2	-0.534224	0.815488	0.901231
ENSG00000064651	SLC12A2	-0.761968	0.60133	0.771179
ENSG00000064652	SNX24	0.222025	0.194441	0.414531
ENSG00000064655	EYA2	-0.364162	0.598312	0.768682
ENSG00000064666	CNN2	-0.448382	0.688606	0.825156
ENSG00000064687	ABCA7	-1.01507	0.139257	0.340936
ENSG00000064692	SNCAIP	0.287269	0.0843635	0.253817
ENSG00000064703	DDX20	-1.56686	0.000356235	0.00633206
ENSG00000064726	BTBD1	-0.210174	0.143427	0.346706
ENSG00000064763	FAR2	-0.487201	0.487408	0.688555
ENSG00000064787	BCAS1	-0.556205	0.219533	0.444334
ENSG00000064835	POU1F1	-0.344188	0.941103	0.971865
ENSG00000064886	CHI3L2	-1.34056	0.00289577	0.0271157
ENSG00000064932	SBNO2	-0.955743	0.046426	0.175265
ENSG00000064933	PMS1	-0.125477	0.127676	0.323429
ENSG00000064961	HMG20B	-0.551387	0.219373	0.444301
ENSG00000064989	CALCRL	-0.301168	0.914384	0.957334
ENSG00000064995	TAF11	-1.16849	0.159935	0.369736
ENSG00000064999	ANKS1A	-0.64561	0.593216	0.764606
ENSG00000065000	AP3D1	-1.52162	0.00102752	0.01331
ENSG00000065029	ZNF76	-0.193015	0.17047	0.384451
ENSG00000065054	SLC9A3R2	0.350918	0.101802	0.283221
ENSG00000065057	NTHL1	0.550746	0.0087936	0.05811
ENSG00000065060	UHRF1BP1	-0.324313	0.220168	0.44499
ENSG00000065135	GNAI3	-0.612161	0.69154	0.826391
ENSG00000065150	IPO5	-1.30859	0.00100671	0.0130909
ENSG00000065154	OAT	-0.11533	0.749553	0.862014
ENSG00000065183	WDR3	-2.37575	2.2061e-05	0.000853529
ENSG00000065243	PKN2	-0.497139	0.427105	0.641387
ENSG00000065268	WDR18	-2.25217	9.56212e-05	0.00250043
ENSG00000065308	TRAM2	-0.733503	0.566577	0.746154
ENSG00000065320	NTN1	-0.163701	0.0475289	0.178057
ENSG00000065325	GLP2R	-0.913397	0.715633	0.841163
ENSG00000065328	MCM10	-1.71524	0.100892	0.281882
ENSG00000065357	DGKA	-0.696264	0.144704	0.348725
ENSG00000065361	ERBB3	-1.00698	0.227419	0.4538
ENSG00000065371	ROPN1	-0.0775139	0.0150455	0.0829913
ENSG00000065413	ANKRD44	-0.232008	0.80687	0.896051
ENSG00000065427	KARS	-2.54321	1.19859e-05	0.000565549
ENSG00000065457	ADAT1	-0.189579	0.650552	0.804617
ENSG00000065485	PDIA5	-0.132249	0.424752	0.639592
ENSG00000065491	TBC1D22B	-0.562816	0.419627	0.63558
ENSG00000065518	NDUFB4	-1.19084	0.0281433	0.12691
ENSG00000065526	SPEN	-1.05086	0.0993248	0.279179
ENSG00000065534	MYLK	0.397756	0.0115648	0.0698428
ENSG00000065548	ZC3H15	0.963293	4.48829e-05	0.00141799
ENSG00000065559	MAP2K4	2.25292	1.02066e-13	6.18043e-10
ENSG00000065600	TMEM206	-0.739044	0.117353	0.308291
ENSG00000065609	SNAP91	-0.934156	0.0383628	0.154386
ENSG00000065613	SLK	-1.36018	0.00359522	0.0314938
ENSG00000065615	CYB5R4	-1.02181	0.0714453	0.229307
ENSG00000065618	COL17A1	-0.42776	0.125427	0.321781
ENSG00000065621	GSTO2	0.116478	0.0113493	0.0688649
ENSG00000065665	SEC61A2	-1.05083	0.057403	0.200574
ENSG00000065675	PRKCQ	0.0209423	0.144343	0.348087
ENSG00000065717	TLE2	-0.0598375	0.58449	0.758526
ENSG00000065802	ASB1	-1.27553	0.00929998	0.0603585
ENSG00000065809	FAM107B	-0.0121544	0.0774686	0.240153
ENSG00000065833	ME1	0.00313404	0.0819088	0.248614
ENSG00000065882	TBC1D1	-0.0424176	0.0995297	0.279582
ENSG00000065883	CDK13	-0.575756	0.158743	0.368058
ENSG00000065911	MTHFD2	0.466896	0.000488864	0.00792213
ENSG00000065923	SLC9A7	-0.883736	0.0986213	0.279043
ENSG00000065970	FOXJ2	-0.436066	0.822587	0.905753
ENSG00000065978	YBX1	-1.23905	0.00449461	0.0367457
ENSG00000065989	PDE4A	-0.724226	0.777042	0.879107
ENSG00000066027	PPP2R5A	0.25005	0.00604304	0.0451389
ENSG00000066032	CTNNA2	0.664644	5.14904e-05	0.00157206
ENSG00000066044	ELAVL1	0.429805	1.82167e-05	0.000743562
ENSG00000066056	TIE1	-0.0856292	0.0952066	0.272452
ENSG00000066084	DIP2B	0.126687	0.0508436	0.185467
ENSG00000066117	SMARCD1	-2.03284	0.00115283	0.014463
ENSG00000066135	KDM4A	-1.76759	0.000113246	0.00280501
ENSG00000066136	NFYC	-0.988733	0.0331866	0.141267
ENSG00000066185	ZMYND12	0.00394991	0.215089	0.439302
ENSG00000066230	SLC9A3	-0.832984	0.548868	0.733898
ENSG00000066248	NGEF	-0.95506	0.123276	0.318365
ENSG00000066279	ASPM	-0.696698	0.717964	0.842417
ENSG00000066294	CD84	-0.187078	0.690767	0.826333
ENSG00000066322	ELOVL1	0.233495	0.0892477	0.262512
ENSG00000066336	SPI1	-0.845046	0.384086	0.604108
ENSG00000066379	ZNRD1	-1.64416	0.00108374	0.0137866
ENSG00000066382	MPPED2	-0.376755	0.441974	0.652792
ENSG00000066405	CLDN18	-0.359706	0.868762	0.93434
ENSG00000066422	ZBTB11	-1.78325	0.00156331	0.0176692
ENSG00000066427	ATXN3	0.584714	0.0080543	0.0545746
ENSG00000066455	GOLGA5	-0.40241	0.634998	0.792918
ENSG00000066468	FGFR2	-1.41122	0.00206518	0.0214377
ENSG00000066557	LRRC40	-0.115069	0.556887	0.739515
ENSG00000066583	ISOC1	0.0845922	0.0480533	0.179137
ENSG00000066629	EML1	0.170805	0.00882213	0.058235
ENSG00000066651	TRMT11	-0.896086	0.754113	0.864522
ENSG00000066654	THUMPD1	-0.526886	0.898432	0.948795
ENSG00000066697	MSANTD3	-0.414398	0.558721	0.740597
ENSG00000066735	KIF26A	0.0194009	0.178687	0.393983
ENSG00000066739	ATG2B	-0.280042	0.433801	0.646148
ENSG00000066777	ARFGEF1	-0.370935	0.277727	0.5063
ENSG00000066813	ACSM2B	0.539632	5.56028e-05	0.00165046
ENSG00000066827	ZFAT	-1.78061	5.91552e-05	0.00173445
ENSG00000066855	MTFR1	-0.654104	0.89747	0.94837
ENSG00000066923	STAG3	-0.85161	0.426693	0.641162
ENSG00000066926	FECH	-0.965305	0.020068	0.100401
ENSG00000066933	MYO9A	0.0560378	0.0321853	0.138648
ENSG00000067048	DDX3Y	0.583229	0.00327693	0.0295281
ENSG00000067057	PFKP	-0.602814	0.375117	0.597229
ENSG00000067064	IDI1	-0.0349713	0.152938	0.3602
ENSG00000067066	SP100	-0.166711	0.307955	0.536239
ENSG00000067082	KLF6	-0.694938	0.221162	0.446129
ENSG00000067113	PPAP2A	0.455446	0.00158825	0.0178265
ENSG00000067141	NEO1	-0.915023	0.258162	0.486794
ENSG00000067167	TRAM1	-0.088141	0.131695	0.32921
ENSG00000067177	PHKA1	-0.360887	0.12465	0.320645
ENSG00000067182	TNFRSF1A	-0.0203547	0.0169589	0.0900542
ENSG00000067191	CACNB1	-1.5696	0.000654462	0.00964172
ENSG00000067208	EVI5	-0.922509	0.0105487	0.0656015
ENSG00000067221	STOML1	-0.0802636	0.0376587	0.153121
ENSG00000067225	PKM	-1.89826	0.00383527	0.0327922
ENSG00000067248	DHX29	-0.955882	0.124976	0.321143
ENSG00000067334	DNTTIP2	-1.42614	0.0107679	0.0663822
ENSG00000067365	METTL22	-0.679127	0.499655	0.698264
ENSG00000067369	TP53BP1	0.510311	0.0149675	0.0829466
ENSG00000067445	TRO	-0.766893	0.873858	0.936838
ENSG00000067533	RRP15	-1.29245	0.0571159	0.2002
ENSG00000067560	RHOA	-0.202194	0.490904	0.690764
ENSG00000067596	DHX8	-1.01951	0.00438431	0.0361367
ENSG00000067606	PRKCZ	-0.803795	0.268346	0.497476
ENSG00000067646	ZFY	0.144877	0.0138136	0.0785411
ENSG00000067704	IARS2	-1.79645	4.06675e-05	0.00132122
ENSG00000067715	SYT1	0.0463744	0.102787	0.284508
ENSG00000067798	NAV3	-0.434133	0.745554	0.860133
ENSG00000067829	IDH3G	-0.0733462	0.180899	0.397172
ENSG00000067836	ROGDI	-0.838958	0.168481	0.382052
ENSG00000067840	PDZD4	0.274408	0.117973	0.309027
ENSG00000067842	ATP2B3	-0.968886	0.0337134	0.142898
ENSG00000067900	ROCK1	1.43233	8.29121e-08	1.71157e-05
ENSG00000067955	CBFB	0.385282	0.010245	0.0644202
ENSG00000067992	PDK3	0.299322	0.0269766	0.123378
ENSG00000068001	HYAL2	0.227834	0.0186911	0.0959158
ENSG00000068024	HDAC4	-0.464202	0.76954	0.873959
ENSG00000068028	RASSF1	-0.16873	0.340339	0.565683
ENSG00000068078	FGFR3	-0.409034	0.788236	0.885479
ENSG00000068079	IFI35	-1.32142	0.47437	0.678154
ENSG00000068097	HEATR6	-0.40655	0.850539	0.922827
ENSG00000068120	COASY	-0.736134	0.388625	0.608092
ENSG00000068137	PLEKHH3	-0.0338534	0.229074	0.455591
ENSG00000068305	MEF2A	-0.207294	0.237476	0.464969
ENSG00000068308	OTUD5	-1.18451	0.0392309	0.156356
ENSG00000068323	TFE3	-0.339054	0.894075	0.947033
ENSG00000068354	TBC1D25	-0.596534	0.496277	0.694826
ENSG00000068366	ACSL4	-1.61327	0.000736226	0.0105392
ENSG00000068383	INPP5A	-0.371918	0.584781	0.75878
ENSG00000068394	GPKOW	-2.06325	0.00580179	0.0438599
ENSG00000068400	GRIPAP1	-1.52004	0.147738	0.353365
ENSG00000068438	FTSJ1	-0.767715	0.602971	0.772058
ENSG00000068489	PRR11	-0.093455	0.125771	0.321781
ENSG00000068615	REEP1	0.775431	0.000195331	0.00414048
ENSG00000068650	ATP11A	0.14269	0.0786466	0.242372
ENSG00000068654	POLR1A	-2.47054	9.01962e-06	0.000466834
ENSG00000068697	LAPTM4A	0.19835	0.0613393	0.208853
ENSG00000068724	TTC7A	-0.978022	0.0593467	0.204339
ENSG00000068745	IP6K2	-0.532372	0.85341	0.924625
ENSG00000068781	STON1-GTF2A1L	-0.477148	0.58786	0.761126
ENSG00000068784	SRBD1	-2.61415	5.86356e-05	0.00172918
ENSG00000068793	CYFIP1	-0.704538	0.74505	0.859993
ENSG00000068796	KIF2A	-0.155462	0.387218	0.606867
ENSG00000068831	RASGRP2	-1.38853	0.0790429	0.242836
ENSG00000068878	PSME4	-0.61802	0.99729	0.999223
ENSG00000068885	IFT80	0.596722	0.130256	0.327551
ENSG00000068903	SIRT2	-0.476552	0.30918	0.537204
ENSG00000068912	ERLEC1	-0.784944	0.295257	0.523998
ENSG00000068971	PPP2R5B	-1.48376	0.0119659	0.0714099
ENSG00000068976	PYGM	-1.02386	0.140114	0.34225
ENSG00000068985	PAGE1	0.206895	0.17336	0.388448
ENSG00000069011	PITX1	0.069306	0.197133	0.417332
ENSG00000069018	TRPC7	0.083171	0.039743	0.157704
ENSG00000069020	MAST4	-1.27057	0.0076244	0.0526635
ENSG00000069122	GPR116	-0.712635	0.600923	0.770821
ENSG00000069188	SDK2	-0.767921	0.341257	0.566325
ENSG00000069206	ADAM7	-0.0042418	0.557087	0.739579
ENSG00000069248	NUP133	-2.49288	6.43007e-06	0.00036276
ENSG00000069275	NUCKS1	0.464212	0.0156592	0.0853226
ENSG00000069329	VPS35	-0.888027	0.00943686	0.0607692
ENSG00000069345	DNAJA2	-1.39117	0.00344811	0.0305404
ENSG00000069399	BCL3	-0.174601	0.269399	0.498737
ENSG00000069424	KCNAB2	0.0566921	0.0644782	0.214683
ENSG00000069431	ABCC9	-0.326646	0.848489	0.921396
ENSG00000069482	GAL	-0.519626	0.432274	0.64532
ENSG00000069493	CLEC2D	-0.0367779	0.187739	0.405765
ENSG00000069509	FUNDC1	-0.208389	0.309141	0.537197
ENSG00000069535	MAOB	-0.263714	0.12887	0.325145
ENSG00000069667	RORA	-0.0989626	0.250487	0.479432
ENSG00000069696	DRD4	0.166208	0.287222	0.515912
ENSG00000069702	TGFBR3	-1.44863	0.0372378	0.152159
ENSG00000069712	KIAA1107	-0.662232	0.653682	0.806214
ENSG00000069764	PLA2G10	-0.744443	0.710143	0.838127
ENSG00000069812	HES2	0.272044	0.0175008	0.0918482
ENSG00000069849	ATP1B3	-1.01498	0.00234252	0.0233174
ENSG00000069869	NEDD4	-0.853396	0.0504371	0.184518
ENSG00000069956	MAPK6	-0.437244	0.697291	0.829698
ENSG00000069966	GNB5	-0.159273	0.567246	0.746547
ENSG00000069974	RAB27A	-0.027287	0.0180429	0.093541
ENSG00000069998	CECR5	-0.426291	0.875792	0.937519
ENSG00000070010	UFD1L	-2.02446	0.000653917	0.00964172
ENSG00000070018	LRP6	-0.112169	0.562016	0.742947
ENSG00000070019	GUCY2C	0.577847	0.00223852	0.0225591
ENSG00000070031	SCT	-0.0785305	0.316892	0.544203
ENSG00000070047	PHRF1	-0.813813	0.216916	0.441478
ENSG00000070061	IKBKAP	-2.46383	7.47851e-06	0.000405536
ENSG00000070081	NUCB2	-0.364713	0.797714	0.891167
ENSG00000070087	PFN2	-0.443807	0.396722	0.61545
ENSG00000070159	PTPN3	-0.0266736	0.419638	0.63558
ENSG00000070182	SPTB	-1.338	0.185269	0.402584
ENSG00000070190	DAPP1	-0.254952	0.219003	0.44387
ENSG00000070193	FGF10	-0.962269	0.294037	0.522971
ENSG00000070214	SLC44A1	-0.0761377	0.108362	0.293359
ENSG00000070269	TMEM260	0.152206	0.101237	0.282499
ENSG00000070366	SMG6	-1.75391	0.0128949	0.0749598
ENSG00000070367	EXOC5	-0.970393	0.237775	0.465289
ENSG00000070371	CLTCL1	-1.26455	0.000862865	0.0117151
ENSG00000070388	FGF22	-0.861307	0.725418	0.847674
ENSG00000070404	FSTL3	-1.12411	0.0242466	0.114406
ENSG00000070413	DGCR2	-0.909466	0.243285	0.471627
ENSG00000070423	RNF126	0.070603	0.240378	0.468606
ENSG00000070444	MNT	0.550542	0.00368012	0.0319718
ENSG00000070476	ZXDC	-0.298463	0.0780441	0.241278
ENSG00000070495	JMJD6	-1.02473	0.52361	0.716666
ENSG00000070501	POLB	-0.192988	0.14035	0.342595
ENSG00000070526	ST6GALNAC1	-0.38491	0.966448	0.984495
ENSG00000070540	WIPI1	-0.196681	0.67665	0.819086
ENSG00000070601	FRMPD1	-0.88627	0.11196	0.299065
ENSG00000070610	GBA2	-0.36965	0.338424	0.564242
ENSG00000070614	NDST1	-1.71325	0.000434544	0.00731597
ENSG00000070669	ASNS	-0.443646	0.822952	0.905936
ENSG00000070718	AP3M2	-0.230496	0.307627	0.536002
ENSG00000070729	CNGB1	-0.980398	0.904203	0.951666
ENSG00000070731	ST6GALNAC2	-0.12397	0.433593	0.646148
ENSG00000070748	CHAT	-0.197479	0.15619	0.364327
ENSG00000070756	PABPC1	-1.36972	0.0574689	0.200702
ENSG00000070759	TESK2	-0.380592	0.872447	0.935977
ENSG00000070761	C16orf80	-1.76613	0.00373693	0.0321883
ENSG00000070770	CSNK2A2	0.548165	0.000303768	0.00570657
ENSG00000070778	PTPN21	-1.25699	0.00425769	0.0354631
ENSG00000070785	EIF2B3	-1.49457	0.020097	0.100491
ENSG00000070808	CAMK2A	-0.00352818	0.165796	0.378325
ENSG00000070814	TCOF1	-1.49501	0.0984755	0.278786
ENSG00000070831	CDC42	-1.07222	0.19946	0.420445
ENSG00000070882	OSBPL3	-0.412598	0.544254	0.73091
ENSG00000070886	EPHA8	-0.733288	0.156345	0.364592
ENSG00000070915	SLC12A3	-0.233902	0.147959	0.35366
ENSG00000070950	RAD18	-0.256075	0.582999	0.757673
ENSG00000070961	ATP2B1	-0.281993	0.642515	0.798244
ENSG00000070985	TRPM5	-1.44286	0.00345685	0.0305582
ENSG00000071051	NCK2	-0.549497	0.303075	0.532261
ENSG00000071054	MAP4K4	0.665827	0.00963412	0.0616221
ENSG00000071073	MGAT4A	-0.363116	0.646465	0.801179
ENSG00000071082	RPL31	-1.01285	0.167655	0.380751
ENSG00000071127	WDR1	-2.61792	1.17625e-07	2.16978e-05
ENSG00000071189	SNX13	-0.0330771	0.174431	0.389708
ENSG00000071203	MS4A12	-0.313848	0.63288	0.791415
ENSG00000071205	ARHGAP10	-0.678305	0.369107	0.591715
ENSG00000071242	RPS6KA2	-0.521307	0.285018	0.513451
ENSG00000071243	ING3	-1.04861	0.000642719	0.00955452
ENSG00000071246	VASH1	-0.224564	0.384127	0.604108
ENSG00000071282	LMCD1	-0.0358942	0.180981	0.397209
ENSG00000071462	WBSCR22	-1.24831	0.00437056	0.0361053
ENSG00000071537	SEL1L	-1.62468	0.0729002	0.232451
ENSG00000071539	TRIP13	-1.67124	0.000129206	0.00308026
ENSG00000071553	ATP6AP1	-1.79674	0.0153762	0.0842354
ENSG00000071564	TCF3	-1.50185	0.0108446	0.0666647
ENSG00000071575	TRIB2	0.180398	0.0475032	0.178
ENSG00000071626	DAZAP1	-0.712634	0.126279	0.321781
ENSG00000071655	MBD3	-1.75068	0.00875768	0.0579359
ENSG00000071677	PRLH	-0.429042	0.890584	0.945927
ENSG00000071794	HLTF	-0.677251	0.873985	0.936838
ENSG00000071859	FAM50A	-2.38689	1.46933e-05	0.000652147
ENSG00000071889	FAM3A	-0.550182	0.564276	0.744635
ENSG00000071894	CPSF1	-2.26828	1.1554e-06	0.000112844
ENSG00000071909	MYO3B	-0.630924	0.676923	0.819362
ENSG00000071967	CYBRD1	-0.324877	0.306802	0.535584
ENSG00000071991	CDH19	-0.268456	0.107883	0.29256
ENSG00000071994	PDCD2	-1.57096	0.00461095	0.0373107
ENSG00000072041	SLC6A15	0.131733	0.108528	0.293688
ENSG00000072042	RDH11	-0.577235	0.151058	0.357662
ENSG00000072062	PRKACA	-0.461445	0.409718	0.627596
ENSG00000072071	LPHN1	-0.220346	0.279592	0.507536
ENSG00000072080	SPP2	0.0616386	0.0578933	0.201512
ENSG00000072110	ACTN1	0.494172	0.00343641	0.0305111
ENSG00000072121	ZFYVE26	-0.646946	0.644246	0.799356
ENSG00000072133	RPS6KA6	-0.44234	0.0956145	0.273275
ENSG00000072134	EPN2	-0.13925	0.203748	0.426086
ENSG00000072135	PTPN18	-0.860765	0.387388	0.607029
ENSG00000072163	LIMS2	-0.278151	0.1052	0.288664
ENSG00000072182	ASIC4	-0.233801	0.767835	0.872653
ENSG00000072195	SPEG	-0.641729	0.959126	0.980994
ENSG00000072201	LNX1	0.158268	0.0338288	0.143148
ENSG00000072210	ALDH3A2	0.0324763	0.0852648	0.255555
ENSG00000072274	TFRC	-0.260419	0.0952626	0.27254
ENSG00000072310	SREBF1	-0.295665	0.64198	0.797907
ENSG00000072315	TRPC5	-0.208596	0.526907	0.718711
ENSG00000072364	AFF4	0.0151786	0.288406	0.517301
ENSG00000072401	UBE2D1	0.169031	0.060481	0.207022
ENSG00000072415	MPP5	-0.126879	0.0194561	0.0983963
ENSG00000072422	RHOBTB1	-0.532961	0.581445	0.756737
ENSG00000072501	SMC1A	-1.67999	0.0175101	0.0918482
ENSG00000072506	HSD17B10	-1.55083	0.000107197	0.00270463
ENSG00000072518	MARK2	-0.345675	0.376971	0.599086
ENSG00000072571	HMMR	-0.346829	0.497831	0.696412
ENSG00000072609	CHFR	-0.655212	0.275556	0.504887
ENSG00000072657	TRHDE	-0.296807	0.729024	0.849702
ENSG00000072682	P4HA2	0.530153	0.0384301	0.154486
ENSG00000072694	FCGR2B	0.507931	0.0203809	0.101297
ENSG00000072736	NFATC3	-0.293647	0.866674	0.932941
ENSG00000072756	TRNT1	-1.65906	0.000474954	0.00776599
ENSG00000072778	ACADVL	-1.19673	0.0727833	0.232247
ENSG00000072786	STK10	-0.34374	0.885654	0.94368
ENSG00000072803	FBXW11	-0.538586	0.311493	0.53958
ENSG00000072818	ACAP1	-1.08907	0.0127054	0.0742141
ENSG00000072832	CRMP1	-0.856172	0.341234	0.566325
ENSG00000072840	EVC	-0.272013	0.406063	0.624302
ENSG00000072849	DERL2	-1.11753	0.0375142	0.152837
ENSG00000072858	SIDT1	-0.396214	0.541926	0.72908
ENSG00000072864	NDE1	-0.612653	0.909998	0.955045
ENSG00000072952	MRVI1	-0.240748	0.54934	0.734201
ENSG00000072954	TMEM38A	-0.103429	0.385603	0.605172
ENSG00000072958	AP1M1	-0.683824	0.0423021	0.164694
ENSG00000073008	PVR	-0.0533156	0.236459	0.464028
ENSG00000073009	IKBKG	-0.716417	0.615855	0.779299
ENSG00000073050	XRCC1	-1.4744	0.00345685	0.0305582
ENSG00000073060	SCARB1	-0.39477	0.997823	0.999336
ENSG00000073067	CYP2W1	-0.706833	0.470808	0.675674
ENSG00000073111	MCM2	-2.29922	3.72443e-07	4.90275e-05
ENSG00000073146	MOV10L1	0.223088	0.0432747	0.167048
ENSG00000073150	PANX2	-0.709733	0.339985	0.565466
ENSG00000073169	SELO	-0.662092	0.812973	0.899584
ENSG00000073282	TP63	0.192117	0.0765154	0.238255
ENSG00000073331	ALPK1	-0.748877	0.190624	0.409781
ENSG00000073350	LLGL2	-0.413269	0.986335	0.994608
ENSG00000073417	PDE8A	-0.302311	0.516185	0.710577
ENSG00000073464	CLCN4	-0.930208	0.57426	0.751315
ENSG00000073536	NLE1	-0.806285	0.23035	0.456965
ENSG00000073578	SDHA	-1.26639	0.0168016	0.0893755
ENSG00000073584	SMARCE1	-1.59257	0.000787251	0.0110264
ENSG00000073598	FNDC8	-0.477548	0.851314	0.923281
ENSG00000073605	GSDMB	-0.871301	0.526528	0.718378
ENSG00000073614	KDM5A	-0.358216	0.721896	0.8447
ENSG00000073670	ADAM11	-0.208849	0.56047	0.741944
ENSG00000073711	PPP2R3A	0.123964	0.00872161	0.0577604
ENSG00000073712	FERMT2	-2.03536	1.33782e-06	0.000125136
ENSG00000073734	ABCB11	-0.0778023	0.085724	0.25637
ENSG00000073737	DHRS9	-0.12367	0.33629	0.56232
ENSG00000073754	CD5L	-0.0487926	0.0571924	0.200339
ENSG00000073756	PTGS2	0.265568	0.0538814	0.193059
ENSG00000073792	IGF2BP2	-0.459568	0.772003	0.875702
ENSG00000073803	MAP3K13	-1.03157	0.29859	0.527337
ENSG00000073849	ST6GAL1	-0.0101411	0.198113	0.418586
ENSG00000073861	TBX21	-0.704486	0.101776	0.283221
ENSG00000073910	FRY	-0.225815	0.758082	0.866666
ENSG00000073921	PICALM	0.363614	0.00296782	0.0276337
ENSG00000073969	NSF	-1.57825	0.00324389	0.0294075
ENSG00000074047	GLI2	-0.364445	0.779444	0.880449
ENSG00000074071	MRPS34	-1.83409	2.07323e-05	0.000822322
ENSG00000074181	NOTCH3	-0.201743	0.316515	0.544094
ENSG00000074201	CLNS1A	-1.808	0.000557996	0.00864894
ENSG00000074211	PPP2R2C	-0.0756779	0.0929469	0.268614
ENSG00000074219	TEAD2	-1.22804	0.125415	0.321781
ENSG00000074266	EED	-0.906898	0.0102908	0.0646188
ENSG00000074276	CDHR2	-0.504821	0.427123	0.641387
ENSG00000074317	SNCB	-0.435151	0.334456	0.560543
ENSG00000074319	TSG101	-1.26105	0.0279253	0.126293
ENSG00000074356	C17orf85	-1.48113	0.0172562	0.0910476
ENSG00000074370	ATP2A3	-0.436012	0.153157	0.360298
ENSG00000074410	CA12	-0.574047	0.952159	0.977502
ENSG00000074416	MGLL	-0.0766513	0.216786	0.441397
ENSG00000074527	NTN4	-0.465468	0.986836	0.994887
ENSG00000074582	BCS1L	-1.58597	0.00235209	0.0233743
ENSG00000074590	NUAK1	-0.275509	0.377042	0.599086
ENSG00000074603	DPP8	-0.694616	0.446001	0.655665
ENSG00000074621	SLC24A1	-0.795029	0.938286	0.970742
ENSG00000074657	ZNF532	0.120053	0.0734277	0.233338
ENSG00000074660	SCARF1	-0.377905	0.878886	0.939167
ENSG00000074695	LMAN1	0.33543	0.0742178	0.234558
ENSG00000074696	PTPLAD1	-0.231364	0.0851531	0.255262
ENSG00000074706	IPCEF1	-0.335352	0.566093	0.7458
ENSG00000074755	ZZEF1	-0.382532	0.0164879	0.0883912
ENSG00000074771	NOX3	-0.910757	0.169892	0.383864
ENSG00000074800	ENO1	-2.00601	0.000602166	0.00917697
ENSG00000074803	SLC12A1	-0.584518	0.286164	0.514902
ENSG00000074842	C19orf10	-0.109886	0.47521	0.678669
ENSG00000074855	ANO8	-0.723638	0.266083	0.495354
ENSG00000074935	TUBE1	-1.86264	0.00887575	0.0584947
ENSG00000074964	ARHGEF10L	-0.321475	0.977886	0.990039
ENSG00000074966	TXK	-0.0354403	0.00145214	0.0167702
ENSG00000075035	WSCD2	-0.936017	0.455881	0.662628
ENSG00000075043	KCNQ2	-0.668782	0.810771	0.897968
ENSG00000075073	TACR2	-0.655153	0.963991	0.983087
ENSG00000075089	ACTR6	-1.50036	0.00256729	0.024794
ENSG00000075131	TIPIN	-0.980111	0.130174	0.327436
ENSG00000075142	SRI	-0.30582	0.702468	0.832857
ENSG00000075151	EIF4G3	-0.349745	0.362322	0.585947
ENSG00000075188	NUP37	-1.20277	0.175089	0.390361
ENSG00000075213	SEMA3A	-0.24007	0.480647	0.682996
ENSG00000075218	GTSE1	-0.639145	0.295023	0.523868
ENSG00000075223	SEMA3C	-0.198886	0.438022	0.649825
ENSG00000075234	TTC38	-0.406183	0.176194	0.391336
ENSG00000075239	ACAT1	0.393097	0.0286836	0.128643
ENSG00000075240	GRAMD4	-0.728233	0.989953	0.996315
ENSG00000075275	CELSR1	-0.393002	0.87177	0.93564
ENSG00000075290	WNT8B	-1.24501	0.0666221	0.219101
ENSG00000075292	ZNF638	-0.599574	0.334456	0.560543
ENSG00000075303	SLC25A40	-0.102567	0.49513	0.694044
ENSG00000075336	TIMM21	-0.2595	0.859107	0.928408
ENSG00000075340	ADD2	-1.61027	0.00894874	0.0587718
ENSG00000075388	FGF4	-0.298854	0.156579	0.364997
ENSG00000075391	RASAL2	0.344534	0.0206412	0.102366
ENSG00000075399	VPS9D1	-0.80149	0.140973	0.343351
ENSG00000075407	ZNF37A	-0.387828	0.911655	0.95602
ENSG00000075413	MARK3	-0.760807	0.148534	0.354429
ENSG00000075415	SLC25A3	-1.06226	0.126279	0.321781
ENSG00000075420	FNDC3B	-0.768385	0.338557	0.564242
ENSG00000075426	FOSL2	-0.0635972	0.0478123	0.178613
ENSG00000075429	CACNG5	-0.0893759	0.027361	0.124572
ENSG00000075461	CACNG4	-0.633395	0.449545	0.658477
ENSG00000075539	FRYL	-1.29479	0.00369172	0.0320267
ENSG00000075568	TMEM131	-1.05264	0.385555	0.605172
ENSG00000075618	FSCN1	-0.455937	0.945232	0.973936
ENSG00000075624	ACTB	-1.77463	0.000689917	0.00997994
ENSG00000075643	MOCOS	-1.0425	0.101042	0.282127
ENSG00000075651	PLD1	0.295453	0.00367436	0.0319585
ENSG00000075673	ATP12A	-0.565595	0.22869	0.455467
ENSG00000075702	WDR62	-1.54123	0.000130757	0.00311315
ENSG00000075711	DLG1	-0.603772	0.135273	0.335201
ENSG00000075785	RAB7A	-1.13051	0.0382497	0.154386
ENSG00000075790	BCAP29	-0.591653	0.131083	0.328497
ENSG00000075826	SEC31B	0.0182277	0.0134474	0.0771179
ENSG00000075856	SART3	-1.65125	8.26828e-05	0.00226207
ENSG00000075884	ARHGAP15	0.320462	0.0597091	0.205347
ENSG00000075886	TUBA3D	0.369306	0.0254205	0.118529
ENSG00000075891	PAX2	0.0719053	0.420949	0.636452
ENSG00000075914	EXOSC7	-2.50984	1.41365e-08	6.08798e-06
ENSG00000075945	KIFAP3	0.249963	0.00412854	0.0346823
ENSG00000075975	MKRN2	-0.987421	0.114655	0.303706
ENSG00000076003	MCM6	-1.62087	0.0365675	0.150445
ENSG00000076043	REXO2	-1.73176	0.000125867	0.00302378
ENSG00000076053	RBM7	-0.914414	0.140034	0.342192
ENSG00000076067	RBMS2	-0.7574	0.722878	0.845631
ENSG00000076108	BAZ2A	-1.50892	0.124195	0.319755
ENSG00000076201	PTPN23	-1.94921	0.00126191	0.0153585
ENSG00000076242	MLH1	-0.251075	0.432141	0.645263
ENSG00000076248	UNG	-0.282927	0.104201	0.287225
ENSG00000076258	FMO4	0.169546	0.260494	0.489427
ENSG00000076321	KLHL20	-0.372694	0.983861	0.993597
ENSG00000076344	RGS11	-0.0985629	0.60796	0.77457
ENSG00000076356	PLXNA2	-0.291224	0.383399	0.603381
ENSG00000076382	SPAG5	-0.960178	0.262357	0.49144
ENSG00000076513	ANKRD13A	-0.357553	0.605968	0.773415
ENSG00000076554	TPD52	-0.439678	0.288517	0.517342
ENSG00000076555	ACACB	-0.418839	0.662134	0.811408
ENSG00000076604	TRAF4	-0.798233	0.618742	0.781752
ENSG00000076641	PAG1	-0.558005	0.50127	0.699509
ENSG00000076650	GPATCH1	-1.38347	0.00181156	0.0195606
ENSG00000076662	ICAM3	-0.382238	0.968424	0.985507
ENSG00000076685	NT5C2	0.0464871	0.338182	0.56403
ENSG00000076706	MCAM	-0.40868	0.984977	0.994006
ENSG00000076716	GPC4	-0.0824833	0.103346	0.285708
ENSG00000076770	MBNL3	0.127792	0.160966	0.371221
ENSG00000076826	CAMSAP3	-0.673404	0.713589	0.839957
ENSG00000076864	RAP1GAP	-0.604441	0.922103	0.961702
ENSG00000076924	XAB2	-1.90043	0.00112998	0.014255
ENSG00000076928	ARHGEF1	-0.991958	0.130939	0.328367
ENSG00000076944	STXBP2	-0.184868	0.0779012	0.241041
ENSG00000076984	MAP2K7	1.57175	5.40245e-07	6.58664e-05
ENSG00000077009	NMRK2	0.0513274	0.224123	0.449633
ENSG00000077044	DGKD	-0.701866	0.909353	0.954653
ENSG00000077063	CTTNBP2	-0.183208	0.103236	0.28553
ENSG00000077080	ACTL6B	-0.238994	0.410897	0.628474
ENSG00000077092	RARB	0.282744	0.00111667	0.0141362
ENSG00000077097	TOP2B	-0.712203	0.332915	0.560543
ENSG00000077147	TM9SF3	-0.790312	0.197754	0.418197
ENSG00000077150	NFKB2	-0.270526	0.905962	0.952855
ENSG00000077152	UBE2T	-1.26455	0.000795908	0.0110965
ENSG00000077157	PPP1R12B	-1.11063	0.0229597	0.110311
ENSG00000077232	DNAJC10	-0.00642938	0.025122	0.11759
ENSG00000077235	GTF3C1	-2.23638	0.000296957	0.00560179
ENSG00000077238	IL4R	-0.150186	0.445203	0.655022
ENSG00000077254	USP33	-0.276369	0.153192	0.360298
ENSG00000077264	PAK3	0.0445791	0.0764966	0.238237
ENSG00000077274	CAPN6	0.167687	0.0451621	0.171671
ENSG00000077279	DCX	0.0749189	0.0152319	0.083697
ENSG00000077312	SNRPA	-1.4963	0.0155523	0.084918
ENSG00000077327	SPAG6	-0.560306	0.898446	0.948795
ENSG00000077348	EXOSC5	-1.53239	0.00695903	0.049673
ENSG00000077380	DYNC1I2	-1.55998	0.0241627	0.114188
ENSG00000077420	APBB1IP	-0.524252	0.783036	0.882586
ENSG00000077454	LRCH4	-0.0492773	0.370131	0.592804
ENSG00000077458	FAM76B	-0.130361	0.407564	0.625692
ENSG00000077463	SIRT6	0.410925	0.0112799	0.068578
ENSG00000077498	TYR	0.417324	0.00265391	0.0255124
ENSG00000077514	POLD3	-1.65505	0.116884	0.307474
ENSG00000077522	ACTN2	-0.501236	0.0888345	0.261678
ENSG00000077549	CAPZB	-2.30635	0.000121267	0.00294905
ENSG00000077585	GPR137B	-0.370284	0.774886	0.877373
ENSG00000077616	NAALAD2	-0.149114	0.553802	0.737537
ENSG00000077713	SLC25A43	-0.257001	0.737617	0.8556
ENSG00000077721	UBE2A	-1.18966	0.0325254	0.139517
ENSG00000077782	FGFR1	-0.622252	0.716033	0.84147
ENSG00000077800	FKBP6	-0.387244	0.627018	0.787556
ENSG00000077809	GTF2I	0.570706	0.011843	0.0710256
ENSG00000077935	SMC1B	0.295667	0.0107879	0.066454
ENSG00000077942	FBLN1	-0.304043	0.591445	0.763668
ENSG00000077943	ITGA8	-0.364177	0.0589759	0.203332
ENSG00000077984	CST7	0.704129	0.000389859	0.00676426
ENSG00000078018	MAP2	0.169694	0.110907	0.297854
ENSG00000078043	PIAS2	-0.231679	0.543479	0.730132
ENSG00000078053	AMPH	-0.392976	0.440244	0.65143
ENSG00000078061	ARAF	0.261769	0.155399	0.363458
ENSG00000078070	MCCC1	0.149464	0.00155154	0.0175828
ENSG00000078081	LAMP3	0.0297839	0.0147275	0.0820993
ENSG00000078098	FAP	0.327683	0.0520174	0.188462
ENSG00000078114	NEBL	-0.682933	0.847884	0.920937
ENSG00000078124	ACER3	-0.0744312	0.0473375	0.177579
ENSG00000078140	UBE2K	-0.319333	0.422172	0.637346
ENSG00000078142	PIK3C3	-1.46525	0.000134853	0.00318975
ENSG00000078177	N4BP2	-0.564158	0.952366	0.977502
ENSG00000078237	C12orf5	0.100368	0.0190772	0.0971837
ENSG00000078246	TULP3	-0.329429	0.584174	0.758526
ENSG00000078269	SYNJ2	-0.494567	0.239094	0.466879
ENSG00000078295	ADCY2	-0.777725	0.713644	0.839968
ENSG00000078304	PPP2R5C	-0.230283	0.25013	0.479027
ENSG00000078328	RBFOX1	-0.102884	0.192484	0.412194
ENSG00000078369	GNB1	-0.0802205	0.0810084	0.246778
ENSG00000078399	HOXA9	-0.377822	0.412027	0.629474
ENSG00000078401	EDN1	-0.35975	0.555882	0.738867
ENSG00000078403	MLLT10	0.424379	0.00140818	0.0163695
ENSG00000078487	ZCWPW1	-0.491502	0.419161	0.635546
ENSG00000078549	ADCYAP1R1	-0.231864	0.680872	0.821094
ENSG00000078579	FGF20	0.39971	0.00315278	0.0288968
ENSG00000078589	P2RY10	0.170598	0.00865783	0.0574211
ENSG00000078596	ITM2A	-0.0436325	0.40066	0.619254
ENSG00000078618	NRD1	-1.05409	0.00281642	0.02659
ENSG00000078668	VDAC3	-0.493237	0.64334	0.798722
ENSG00000078674	PCM1	-1.07466	0.0877247	0.259418
ENSG00000078687	TNRC6C	-0.851903	0.580015	0.755994
ENSG00000078699	CBFA2T2	-1.14255	0.168522	0.382057
ENSG00000078725	BRINP1	-0.376011	0.697779	0.829789
ENSG00000078747	ITCH	-0.627001	0.830333	0.910439
ENSG00000078795	PKD2L2	-0.179972	0.609626	0.775854
ENSG00000078804	TP53INP2	-0.386537	0.683075	0.82188
ENSG00000078808	SDF4	-0.617541	0.274174	0.503961
ENSG00000078814	MYH7B	-0.50226	0.671387	0.816323
ENSG00000078898	BPIFB2	-0.411726	0.997811	0.999336
ENSG00000078900	TP73	-0.0247923	0.479039	0.681352
ENSG00000078902	TOLLIP	0.213864	0.0599357	0.205704
ENSG00000078967	UBE2D4	-0.595811	0.100551	0.281363
ENSG00000079101	CLUL1	-0.646954	0.505039	0.702202
ENSG00000079102	RUNX1T1	-0.900294	0.0693362	0.225587
ENSG00000079112	CDH17	-0.196558	0.574122	0.751227
ENSG00000079134	THOC1	-1.35421	0.00703562	0.0500231
ENSG00000079150	FKBP7	0.0778718	0.0650198	0.215764
ENSG00000079156	OSBPL6	0.10857	0.0697171	0.226129
ENSG00000079215	SLC1A3	-0.124351	0.645742	0.80072
ENSG00000079246	XRCC5	-2.13927	6.82728e-07	7.71983e-05
ENSG00000079257	LXN	0.148378	0.101943	0.283247
ENSG00000079263	SP140	0.0618173	0.225067	0.451077
ENSG00000079277	MKNK1	-0.415049	0.822587	0.905753
ENSG00000079308	TNS1	-0.234578	0.462286	0.667931
ENSG00000079313	REXO1	-2.04509	5.13095e-05	0.00156917
ENSG00000079332	SAR1A	-0.577517	0.933349	0.96793
ENSG00000079335	CDC14A	0.238371	0.0185608	0.0954092
ENSG00000079337	RAPGEF3	-0.123101	0.550523	0.734742
ENSG00000079385	CEACAM1	0.434514	0.0503796	0.184464
ENSG00000079387	SENP1	-0.410633	0.541893	0.72908
ENSG00000079393	DUSP13	-0.43789	0.480881	0.683055
ENSG00000079432	CIC	-0.117896	0.196392	0.416686
ENSG00000079435	LIPE	-1.01924	0.340138	0.565527
ENSG00000079459	FDFT1	-2.39261	0.000109377	0.00274061
ENSG00000079462	PAFAH1B3	0.523266	0.0125398	0.0735532
ENSG00000079482	OPHN1	-0.194635	0.790139	0.886471
ENSG00000079557	AFM	-0.420738	0.781139	0.881848
ENSG00000079616	KIF22	-0.932707	0.353021	0.57707
ENSG00000079689	SCGN	0.043602	0.0485705	0.180388
ENSG00000079691	LRRC16A	-0.463292	0.530493	0.72079
ENSG00000079739	PGM1	-0.065496	0.105435	0.288703
ENSG00000079785	DDX1	-1.35569	0.00633077	0.0465042
ENSG00000079805	DNM2	-2.15081	0.00250002	0.0243383
ENSG00000079819	EPB41L2	-0.631305	0.6709	0.816314
ENSG00000079841	RIMS1	-0.163473	0.315464	0.543532
ENSG00000079931	MOXD1	0.156621	0.0045615	0.0370273
ENSG00000079950	STX7	-0.529716	0.319211	0.546334
ENSG00000079974	RABL2B	-0.926867	0.390844	0.610181
ENSG00000079999	KEAP1	-0.282344	0.788022	0.885457
ENSG00000080007	DDX43	-0.367613	0.427237	0.641387
ENSG00000080031	PTPRH	-0.896798	0.524489	0.717027
ENSG00000080166	DCT	-0.120342	0.0801822	0.245176
ENSG00000080189	SLC35C2	0.0347556	0.349577	0.574127
ENSG00000080224	EPHA6	-0.147967	0.478645	0.681004
ENSG00000080293	SCTR	-0.20954	0.403354	0.62154
ENSG00000080298	RFX3	-0.0258127	0.429687	0.642814
ENSG00000080345	RIF1	-1.43523	0.0112685	0.0685545
ENSG00000080371	RAB21	-0.528176	0.745768	0.860167
ENSG00000080493	SLC4A4	-0.620676	0.769657	0.873959
ENSG00000080503	SMARCA2	-0.407026	0.677418	0.819633
ENSG00000080511	RDH8	-1.13573	0.0253061	0.118147
ENSG00000080546	SESN1	-0.0727218	0.256041	0.485229
ENSG00000080561	MID2	-0.11932	0.516185	0.710577
ENSG00000080572	PIH1D3	-0.0868798	0.409176	0.627105
ENSG00000080573	COL5A3	-0.612593	0.552865	0.736855
ENSG00000080603	SRCAP	-1.69489	0.0089471	0.0587718
ENSG00000080608	KIAA0020	-1.77276	0.000368504	0.00649296
ENSG00000080618	CPB2	0.0470159	0.26938	0.498737
ENSG00000080644	CHRNA3	-0.520286	0.206637	0.429799
ENSG00000080709	KCNN2	-0.264155	0.186458	0.404044
ENSG00000080802	CNOT4	0.43189	0.0135996	0.0777374
ENSG00000080815	PSEN1	-1.45443	0.00317351	0.028999
ENSG00000080819	CPOX	-1.07621	0.0521015	0.188691
ENSG00000080822	CLDND1	0.369186	0.00126311	0.0153585
ENSG00000080823	MOK	0.189948	0.231158	0.457929
ENSG00000080824	HSP90AA1	0.417184	0.038771	0.155341
ENSG00000080839	RBL1	0.517309	0.000808081	0.0112229
ENSG00000080845	DLGAP4	-0.403246	0.851951	0.923697
ENSG00000080910	CFHR2	-0.0248304	0.193023	0.412792
ENSG00000080986	NDC80	-1.67527	1.65096e-05	0.000694122
ENSG00000081014	AP4E1	0.0605979	0.0201329	0.100615
ENSG00000081019	RSBN1	-0.389285	0.469012	0.674182
ENSG00000081026	MAGI3	-0.696496	0.798733	0.891792
ENSG00000081041	CXCL2	-0.435085	0.92207	0.961702
ENSG00000081051	AFP	-0.0623529	0.0326619	0.139905
ENSG00000081052	COL4A4	-0.176278	0.623243	0.78493
ENSG00000081059	TCF7	-0.416661	0.981177	0.991934
ENSG00000081087	OSTM1	-0.327174	0.907638	0.953568
ENSG00000081138	CDH7	-0.713526	0.71764	0.842324
ENSG00000081148	IMPG2	-0.623986	0.527836	0.719328
ENSG00000081154	PCNP	-0.650993	0.414158	0.631016
ENSG00000081177	EXD2	0.0931203	0.0220648	0.10703
ENSG00000081181	ARG2	-0.149117	0.54695	0.732519
ENSG00000081189	MEF2C	-0.346551	0.963551	0.982976
ENSG00000081237	PTPRC	0.160911	0.0470716	0.17704
ENSG00000081248	CACNA1S	-1.09692	0.00149193	0.0171463
ENSG00000081277	PKP1	-0.328893	0.107848	0.29256
ENSG00000081307	UBA5	-0.891102	0.111892	0.29896
ENSG00000081320	STK17B	-0.0687505	0.440487	0.651514
ENSG00000081377	CDC14B	0.310524	0.0048339	0.03843
ENSG00000081386	ZNF510	-0.00659711	0.436454	0.648443
ENSG00000081479	LRP2	0.125437	0.0196092	0.098895
ENSG00000081665	ZNF506	0.238726	0.12625	0.321781
ENSG00000081692	JMJD4	0.151659	0.142542	0.345441
ENSG00000081721	DUSP12	-0.875974	0.209487	0.432659
ENSG00000081760	AACS	-0.325107	0.579838	0.755891
ENSG00000081791	KIAA0141	0.00310985	0.0937868	0.270305
ENSG00000081800	SLC13A1	-0.313869	0.961666	0.982157
ENSG00000081803	CADPS2	-0.231961	0.209393	0.432549
ENSG00000081818	PCDHB4	-0.225913	0.539066	0.727323
ENSG00000081842	PCDHA6	0.710634	0.00112805	0.0142406
ENSG00000081853	PCDHGA2	-0.11524	0.440652	0.651704
ENSG00000081870	HSPB11	0.317023	0.0163613	0.0880073
ENSG00000081913	PHLPP1	-0.741072	0.746433	0.860689
ENSG00000081923	ATP8B1	-0.424098	0.896568	0.948078
ENSG00000081985	IL12RB2	-0.116837	0.0573797	0.200569
ENSG00000082014	SMARCD3	-0.595567	0.645584	0.800649
ENSG00000082068	WDR70	-1.61469	0.00336237	0.0300299
ENSG00000082074	FYB	-0.638882	0.0637163	0.213437
ENSG00000082126	MPP4	-0.643421	0.888905	0.945203
ENSG00000082146	STRADB	-0.612608	0.190139	0.408982
ENSG00000082153	BZW1	-0.319629	0.994519	0.99805
ENSG00000082175	PGR	0.0390496	0.152034	0.358915
ENSG00000082196	C1QTNF3	-0.301222	0.0869791	0.258264
ENSG00000082212	ME2	-0.440936	0.217237	0.441917
ENSG00000082213	C5orf22	-0.203022	0.419427	0.635578
ENSG00000082258	CCNT2	-1.50127	0.00866406	0.0574211
ENSG00000082269	FAM135A	-0.0540419	0.106442	0.290422
ENSG00000082293	COL19A1	-1.16332	0.0335486	0.142594
ENSG00000082397	EPB41L3	-0.757881	0.277497	0.506109
ENSG00000082438	COBLL1	-0.787181	0.508118	0.704401
ENSG00000082458	DLG3	0.113875	0.0594649	0.204707
ENSG00000082482	KCNK2	-0.407125	0.592091	0.764024
ENSG00000082497	SERTAD4	-0.213062	0.505555	0.702564
ENSG00000082512	TRAF5	-0.356771	0.919353	0.960322
ENSG00000082515	MRPL22	-0.749533	0.450711	0.659267
ENSG00000082516	GEMIN5	-2.3888	6.92986e-09	3.65426e-06
ENSG00000082556	OPRK1	0.490522	0.00999707	0.0632776
ENSG00000082641	NFE2L1	-0.612318	0.976208	0.988782
ENSG00000082684	SEMA5B	-1.18648	0.0162428	0.0875311
ENSG00000082701	GSK3B	1.06336	0.00130922	0.01564
ENSG00000082781	ITGB5	-0.915495	0.261703	0.490717
ENSG00000082805	ERC1	-0.501477	0.42014	0.63587
ENSG00000082898	XPO1	-3.40451	1.48428e-10	2.69634e-07
ENSG00000082929	C4orf6	-0.310363	0.314038	0.542334
ENSG00000082996	RNF13	0.0887053	0.130942	0.328367
ENSG00000083067	TRPM3	0.155413	0.160511	0.370723
ENSG00000083093	PALB2	-1.84268	0.00157522	0.0177405
ENSG00000083097	DOPEY1	-0.246833	0.623486	0.785076
ENSG00000083099	LYRM2	-0.199656	0.187232	0.405056
ENSG00000083123	BCKDHB	-0.390187	0.766082	0.871478
ENSG00000083168	KAT6A	-0.438111	0.73907	0.856028
ENSG00000083223	ZCCHC6	-0.466346	0.947468	0.975279
ENSG00000083290	ULK2	-0.341651	0.748379	0.861658
ENSG00000083307	GRHL2	-0.161633	0.753075	0.86396
ENSG00000083312	TNPO1	-1.85964	0.000241153	0.00483531
ENSG00000083444	PLOD1	-0.24678	0.666851	0.813807
ENSG00000083454	P2RX5	-1.11747	0.393144	0.612052
ENSG00000083457	ITGAE	-0.784526	0.126279	0.321781
ENSG00000083520	DIS3	-2.10556	4.28519e-06	0.00026841
ENSG00000083535	PIBF1	-0.224454	0.237671	0.465201
ENSG00000083544	TDRD3	-0.214417	0.332949	0.560543
ENSG00000083635	NUFIP1	-1.72241	0.00169824	0.0186345
ENSG00000083642	PDS5B	-0.811187	0.948799	0.975999
ENSG00000083720	OXCT1	-0.585261	0.997025	0.99906
ENSG00000083750	RRAGB	-0.0448115	0.20216	0.42387
ENSG00000083782	EPYC	0.0327347	0.055134	0.195575
ENSG00000083799	CYLD	-0.775915	0.0768331	0.238835
ENSG00000083807	SLC27A5	-1.09893	0.35927	0.583556
ENSG00000083812	ZNF324	-0.24083	0.94123	0.971941
ENSG00000083814	ZNF671	0.155496	0.0141224	0.0798221
ENSG00000083817	ZNF416	0.039713	0.448608	0.657794
ENSG00000083828	ZNF586	-0.485341	0.911253	0.955873
ENSG00000083838	ZNF446	-0.383223	0.4841	0.685989
ENSG00000083844	ZNF264	0.293836	0.0444161	0.169652
ENSG00000083845	RPS5	-1.61607	0.00197385	0.0207746
ENSG00000083857	FAT1	-0.0459665	0.0376076	0.153076
ENSG00000083896	YTHDC1	-2.60077	5.59775e-08	1.27111e-05
ENSG00000083937	CHMP2B	-0.0113964	0.398153	0.616708
ENSG00000084070	SMAP2	-1.04682	0.0165762	0.0887222
ENSG00000084072	PPIE	-2.35397	2.81899e-05	0.0010221
ENSG00000084073	ZMPSTE24	-0.619106	0.966097	0.984256
ENSG00000084090	STARD7	-0.826571	0.358919	0.583247
ENSG00000084092	NOA1	-1.28965	0.00994883	0.0631263
ENSG00000084093	REST	-1.25312	0.0145581	0.0814796
ENSG00000084110	HAL	-0.79461	0.289221	0.518084
ENSG00000084112	SSH1	0.041322	0.00353542	0.0311132
ENSG00000084207	GSTP1	-0.571203	0.792136	0.887829
ENSG00000084234	APLP2	-0.284237	0.472056	0.676799
ENSG00000084444	KIAA1467	-0.343212	0.544287	0.73091
ENSG00000084453	SLCO1A2	-0.198631	0.337359	0.56333
ENSG00000084463	WBP11	-2.21471	0.00011548	0.00283872
ENSG00000084623	EIF3I	-1.93711	0.00156403	0.0176692
ENSG00000084628	NKAIN1	-0.496292	0.922563	0.962016
ENSG00000084636	COL16A1	0.0335156	0.0287463	0.128683
ENSG00000084652	TXLNA	-0.458627	0.859949	0.928931
ENSG00000084674	APOB	-0.256993	0.927511	0.964749
ENSG00000084676	NCOA1	-0.672774	0.54982	0.734512
ENSG00000084693	AGBL5	-1.67533	0.0040803	0.0343797
ENSG00000084710	EFR3B	-1.14291	0.0225018	0.108657
ENSG00000084731	KIF3C	-1.39119	0.0347794	0.145976
ENSG00000084733	RAB10	-0.196015	0.262781	0.491654
ENSG00000084734	GCKR	-0.172142	0.230111	0.456752
ENSG00000084754	HADHA	-0.210916	0.183105	0.399729
ENSG00000084764	MAPRE3	-0.0697514	0.065973	0.217863
ENSG00000084774	CAD	-1.14036	0.0269341	0.123277
ENSG00000085063	CD59	-0.069089	0.165537	0.377873
ENSG00000085117	CD82	-0.451187	0.925762	0.963498
ENSG00000085185	BCORL1	0.21769	0.181477	0.397673
ENSG00000085224	ATRX	-0.940444	0.0617707	0.209469
ENSG00000085231	TAF9	-0.338427	0.681038	0.821094
ENSG00000085265	FCN1	-0.455567	0.55873	0.740597
ENSG00000085274	MYNN	-0.207939	0.415847	0.632773
ENSG00000085276	MECOM	-0.591349	0.876524	0.93787
ENSG00000085377	PREP	-0.361739	0.567108	0.74642
ENSG00000085382	HACE1	-0.329639	0.700091	0.831489
ENSG00000085415	SEH1L	-1.12019	0.152029	0.358915
ENSG00000085433	WDR47	-0.617479	0.696532	0.829415
ENSG00000085449	WDFY1	-0.649942	0.916395	0.958293
ENSG00000085465	OVGP1	0.236919	0.00265401	0.0255124
ENSG00000085491	SLC25A24	0.0166855	0.0265351	0.122004
ENSG00000085511	MAP3K4	-0.142798	0.410728	0.628424
ENSG00000085514	PILRA	-0.827271	0.768263	0.873013
ENSG00000085552	IGSF9	-0.541124	0.786549	0.884186
ENSG00000085563	ABCB1	-0.49769	0.29522	0.523998
ENSG00000085644	ZNF213	-0.5203	0.741765	0.858001
ENSG00000085662	AKR1B1	-0.235417	0.351042	0.575208
ENSG00000085719	CPNE3	-0.148185	0.13487	0.3346
ENSG00000085721	RRN3	-1.7237	2.35401e-05	0.000889044
ENSG00000085733	CTTN	-0.964279	0.545426	0.731503
ENSG00000085741	WNT11	0.109526	0.171702	0.386079
ENSG00000085760	MTIF2	-1.52272	0.0209009	0.103119
ENSG00000085788	DDHD2	-0.415799	0.617251	0.780686
ENSG00000085831	TTC39A	-1.83482	0.00065941	0.00967734
ENSG00000085832	EPS15	-0.238869	0.14755	0.353056
ENSG00000085840	ORC1	-1.78579	0.0463498	0.175014
ENSG00000085871	MGST2	-0.249856	0.308516	0.536841
ENSG00000085872	CHERP	-1.13091	0.0643875	0.214499
ENSG00000085978	ATG16L1	-0.224762	0.557237	0.739579
ENSG00000085982	USP40	-0.0976656	0.0603667	0.206731
ENSG00000085998	POMGNT1	0.31561	0.00438314	0.0361367
ENSG00000085999	RAD54L	-0.090349	0.644772	0.799899
ENSG00000086015	MAST2	-0.270107	0.675344	0.818418
ENSG00000086061	DNAJA1	-0.880957	0.0703006	0.227036
ENSG00000086062	B4GALT1	-1.10574	0.0732605	0.232992
ENSG00000086065	CHMP5	-0.772563	0.564464	0.744829
ENSG00000086102	NFX1	-0.790735	0.467945	0.673498
ENSG00000086159	AQP6	-0.10504	0.662847	0.811741
ENSG00000086189	DIMT1	-1.27368	0.0101252	0.0639336
ENSG00000086200	IPO11	-2.0946	3.51835e-07	4.7344e-05
ENSG00000086205	FOLH1	0.114032	0.017071	0.0903854
ENSG00000086232	EIF2AK1	-0.49614	0.670691	0.816115
ENSG00000086288	NME8	-0.182607	0.254963	0.484382
ENSG00000086289	EPDR1	-0.563634	0.638702	0.795378
ENSG00000086300	SNX10	-0.330633	0.674708	0.818098
ENSG00000086475	SEPHS1	-1.61209	0.0179441	0.0932415
ENSG00000086504	MRPL28	-2.23314	2.81221e-07	3.92973e-05
ENSG00000086506	HBQ1	-1.37557	0.133031	0.331713
ENSG00000086544	ITPKC	-0.285347	0.764171	0.870504
ENSG00000086548	CEACAM6	0.155204	0.00615724	0.045725
ENSG00000086570	FAT2	-0.624745	0.666185	0.813415
ENSG00000086589	RBM22	-2.4537	8.20174e-08	1.71157e-05
ENSG00000086598	TMED2	-1.59407	0.0755369	0.236989
ENSG00000086619	ERO1LB	0.0458378	0.304505	0.533432
ENSG00000086666	ZFAND6	-0.0964228	0.404126	0.622307
ENSG00000086696	HSD17B2	0.323115	0.248955	0.477809
ENSG00000086712	TXLNG	-0.577505	0.893021	0.94673
ENSG00000086717	PPEF1	-0.510939	0.89599	0.94791
ENSG00000086730	LAT2	-0.114785	0.0839244	0.252915
ENSG00000086758	HUWE1	-0.877107	0.21914	0.443999
ENSG00000086827	ZW10	-1.85925	0.00109535	0.0139148
ENSG00000086848	ALG9	-0.144449	0.469391	0.674443
ENSG00000086967	MYBPC2	-0.288185	0.231143	0.457929
ENSG00000086991	NOX4	-0.328388	0.429016	0.642445
ENSG00000087008	ACOX3	-0.355588	0.725678	0.847677
ENSG00000087053	MTMR2	-0.178237	0.403194	0.621346
ENSG00000087074	PPP1R15A	-0.591893	0.989252	0.996077
ENSG00000087076	HSD17B14	-0.0207491	0.285131	0.513604
ENSG00000087077	TRIP6	-1.18996	0.634955	0.792918
ENSG00000087085	ACHE	-1.56346	0.0018179	0.0195756
ENSG00000087086	FTL	-0.680765	0.747473	0.861421
ENSG00000087087	SRRT	-1.75696	8.38802e-06	0.000442121
ENSG00000087088	BAX	0.664029	0.000104032	0.0026575
ENSG00000087095	NLK	-0.805426	0.126279	0.321781
ENSG00000087111	PIGS	-1.2265	0.0189311	0.0967378
ENSG00000087116	ADAMTS2	-0.142691	0.150452	0.356897
ENSG00000087128	TMPRSS11E	-0.322695	0.175159	0.390422
ENSG00000087152	ATXN7L3	0.493214	0.00127677	0.0154217
ENSG00000087157	PGS1	-1.60302	0.000301266	0.00566542
ENSG00000087191	PSMC5	-2.35122	1.0538e-06	0.000105764
ENSG00000087206	UIMC1	-1.07345	0.102784	0.284508
ENSG00000087237	CETP	-0.536943	0.847356	0.920583
ENSG00000087245	MMP2	-0.547624	0.993205	0.997631
ENSG00000087250	MT3	0.0941599	0.0266223	0.122374
ENSG00000087253	LPCAT2	-0.258197	0.458097	0.66468
ENSG00000087258	GNAO1	-0.561201	0.55066	0.734742
ENSG00000087263	OGFOD1	-1.16375	0.0319968	0.138065
ENSG00000087266	SH3BP2	-0.712722	0.208238	0.431144
ENSG00000087269	NOP14	-2.26089	6.81345e-06	0.000382016
ENSG00000087274	ADD1	-0.381048	0.411012	0.628474
ENSG00000087299	L2HGDH	-0.288169	0.686414	0.824695
ENSG00000087301	TXNDC16	-0.841171	0.0968289	0.275748
ENSG00000087302	C14orf166	-0.412415	0.998597	0.999622
ENSG00000087303	NID2	-0.577035	0.662745	0.811741
ENSG00000087338	GMCL1	-0.62907	0.627671	0.787851
ENSG00000087365	SF3B2	-1.5341	0.00277113	0.0263011
ENSG00000087448	KLHL42	-0.0447633	0.0969038	0.275874
ENSG00000087460	GNAS	-0.679158	0.484685	0.686426
ENSG00000087470	DNM1L	-2.1706	2.462e-08	7.58044e-06
ENSG00000087494	PTHLH	-0.725295	0.708918	0.837389
ENSG00000087495	PHACTR3	-1.3922	0.00669726	0.0485097
ENSG00000087502	ERGIC2	-0.126722	0.145599	0.35028
ENSG00000087510	TFAP2C	-2.11971	2.10483e-05	0.000829423
ENSG00000087586	AURKA	-1.61047	0.000509193	0.00811404
ENSG00000087589	CASS4	-0.558072	0.580894	0.75629
ENSG00000087842	PIR	-0.222814	0.441071	0.652022
ENSG00000087884	AAMDC	-0.719672	0.915446	0.957673
ENSG00000087903	RFX2	-0.720733	0.40536	0.623572
ENSG00000087916	SLC6A14	-0.567567	0.477517	0.679932
ENSG00000087995	METTL2A	0.141118	0.00154192	0.0175395
ENSG00000088002	SULT2B1	-0.367176	0.284005	0.512053
ENSG00000088035	ALG6	-1.00721	0.295257	0.523998
ENSG00000088038	CNOT3	-1.50277	0.00308254	0.0283963
ENSG00000088053	GP6	-0.960132	0.151561	0.358357
ENSG00000088179	PTPN4	-0.48554	0.761345	0.868647
ENSG00000088205	DDX18	-2.05411	0.00535907	0.0413739
ENSG00000088247	KHSRP	-0.792791	0.111855	0.298906
ENSG00000088256	GNA11	-1.48769	0.00241725	0.0237724
ENSG00000088280	ASAP3	-0.690567	0.695182	0.828544
ENSG00000088298	EDEM2	-0.191142	0.893652	0.947033
ENSG00000088305	DNMT3B	0.197019	0.0137757	0.0784865
ENSG00000088320	REM1	-0.191378	0.17927	0.395016
ENSG00000088325	TPX2	-1.91323	0.00107113	0.0136645
ENSG00000088356	PDRG1	-2.28743	1.72681e-05	0.000716193
ENSG00000088367	EPB41L1	-0.620985	0.552682	0.736699
ENSG00000088386	SLC15A1	-0.318577	0.720515	0.843573
ENSG00000088387	DOCK9	-1.00367	0.115667	0.30523
ENSG00000088448	ANKRD10	-0.0563033	0.0153651	0.0842354
ENSG00000088451	TGDS	-0.322372	0.694417	0.828078
ENSG00000088538	DOCK3	-0.330706	0.853469	0.924625
ENSG00000088543	C3orf18	-0.621145	0.53165	0.72182
ENSG00000088682	COQ9	-1.06591	0.354751	0.578577
ENSG00000088726	TMEM40	-1.06585	0.173989	0.389103
ENSG00000088727	KIF9	-0.305469	0.454457	0.661777
ENSG00000088756	ARHGAP28	-0.0409233	0.539186	0.72743
ENSG00000088766	CRLS1	-1.69626	0.000229514	0.00468628
ENSG00000088782	DEFB127	-0.146866	0.0581868	0.201982
ENSG00000088808	PPP1R13B	-1.0412	0.433204	0.646098
ENSG00000088812	ATRN	-0.899371	0.10531	0.288664
ENSG00000088826	SMOX	-0.561097	0.653725	0.806214
ENSG00000088827	SIGLEC1	-0.987048	0.186513	0.404044
ENSG00000088832	FKBP1A	0.640977	4.1671e-05	0.00134219
ENSG00000088833	NSFL1C	-0.136137	0.332792	0.560543
ENSG00000088836	SLC4A11	-1.2924	0.000649838	0.00962884
ENSG00000088854	C20orf194	-0.12546	0.0980525	0.277925
ENSG00000088876	ZNF343	-0.778387	0.781784	0.882159
ENSG00000088881	EBF4	-0.885007	0.720893	0.843798
ENSG00000088882	CPXM1	-0.234802	0.443718	0.653723
ENSG00000088888	MAVS	-0.8268	0.316704	0.544196
ENSG00000088926	F11	-0.167063	0.390324	0.609664
ENSG00000088930	XRN2	-1.79189	0.00211551	0.0217736
ENSG00000088986	DYNLL1	-1.81781	0.000664812	0.00971599
ENSG00000088992	TESC	-0.345493	0.671754	0.81652
ENSG00000089006	SNX5	-0.308545	0.46941	0.674443
ENSG00000089009	RPL6	-1.8359	0.000111945	0.00278575
ENSG00000089012	SIRPG	-0.125444	0.141713	0.344308
ENSG00000089022	MAPKAPK5	-0.296906	0.467529	0.673171
ENSG00000089041	P2RX7	-0.533709	0.972428	0.987687
ENSG00000089048	ESF1	-0.643602	0.63804	0.794968
ENSG00000089050	RBBP9	-0.0621827	0.165401	0.377777
ENSG00000089053	ANAPC5	-2.16241	3.31398e-06	0.000229778
ENSG00000089057	SLC23A2	-0.446213	0.355454	0.579327
ENSG00000089060	SLC8B1	-1.04319	0.0431382	0.166665
ENSG00000089063	TMEM230	-0.480452	0.986924	0.99492
ENSG00000089091	DZANK1	-0.365169	0.992418	0.997469
ENSG00000089094	KDM2B	-2.11182	0.000150184	0.00343767
ENSG00000089101	C20orf26	-0.725127	0.625568	0.786641
ENSG00000089116	LHX5	-0.589417	0.439299	0.650762
ENSG00000089123	TASP1	-0.430895	0.461446	0.667141
ENSG00000089127	OAS1	-1.1615	0.0631352	0.212234
ENSG00000089154	GCN1L1	-1.61037	0.011401	0.0690315
ENSG00000089157	RPLP0	-1.56974	0.000218057	0.00449627
ENSG00000089159	PXN	-1.02301	0.0161252	0.0870262
ENSG00000089163	SIRT4	-0.355656	0.518143	0.712228
ENSG00000089169	RPH3A	0.111327	0.130096	0.32742
ENSG00000089177	KIF16B	-0.355406	0.623691	0.785097
ENSG00000089195	TRMT6	-2.21015	1.10828e-05	0.000533962
ENSG00000089199	CHGB	-1.40208	0.070427	0.227283
ENSG00000089220	PEBP1	-0.0747856	0.079489	0.243728
ENSG00000089225	TBX5	-1.50917	0.0022031	0.0223334
ENSG00000089234	BRAP	-1.2997	0.0116637	0.0702294
ENSG00000089248	ERP29	0.0477321	0.0500899	0.183974
ENSG00000089250	NOS1	-0.688418	0.878186	0.938806
ENSG00000089280	FUS	-0.772735	0.184979	0.402147
ENSG00000089289	IGBP1	-1.77223	0.0280704	0.126705
ENSG00000089327	FXYD5	0.256243	0.0197177	0.0993136
ENSG00000089335	ZNF302	0.403267	0.0310262	0.135193
ENSG00000089351	GRAMD1A	-0.743698	0.611093	0.776377
ENSG00000089356	FXYD3	0.0224918	0.0697565	0.226129
ENSG00000089472	HEPH	-0.0400631	0.490773	0.690712
ENSG00000089486	CDIP1	-0.240721	0.258475	0.487232
ENSG00000089505	CMTM1	0.0432665	0.148972	0.355007
ENSG00000089558	KCNH4	-0.808674	0.664296	0.812237
ENSG00000089597	GANAB	-0.759008	0.121817	0.316043
ENSG00000089639	GMIP	-1.29576	0.136104	0.336252
ENSG00000089682	RBM41	-1.43414	0.038559	0.154696
ENSG00000089685	BIRC5	-1.95577	0.00250336	0.0243578
ENSG00000089692	LAG3	-1.1277	0.0168203	0.0894488
ENSG00000089693	MLF2	0.0198458	0.0722786	0.231246
ENSG00000089723	OTUB2	-0.156538	0.076365	0.238024
ENSG00000089737	DDX24	-1.78901	0.00163935	0.0182144
ENSG00000089775	ZBTB25	-0.142188	0.306169	0.535156
ENSG00000089818	NECAP1	-0.199635	0.61459	0.778512
ENSG00000089820	ARHGAP4	-0.588249	0.291666	0.52037
ENSG00000089847	ANKRD24	-0.31639	0.948762	0.975999
ENSG00000089876	DHX32	-0.486818	0.559233	0.740832
ENSG00000089902	RCOR1	0.39965	0.00547664	0.0420315
ENSG00000089916	GPATCH2L	-0.44142	0.478149	0.680565
ENSG00000090013	BLVRB	0.232855	0.0163937	0.0881087
ENSG00000090020	SLC9A1	-0.500617	0.826102	0.907966
ENSG00000090054	SPTLC1	0.0101261	0.191985	0.411417
ENSG00000090060	PAPOLA	-0.84312	0.450877	0.659335
ENSG00000090061	CCNK	-1.60042	0.00598754	0.044872
ENSG00000090097	PCBP4	-0.222225	0.943271	0.972721
ENSG00000090104	RGS1	-0.753226	0.993883	0.997951
ENSG00000090238	YPEL3	-0.281052	0.86865	0.934274
ENSG00000090263	MRPS33	-1.3295	0.0143149	0.0806475
ENSG00000090266	NDUFB2	-0.0427927	0.488669	0.689435
ENSG00000090273	NUDC	-1.48604	0.0299079	0.131743
ENSG00000090316	MAEA	-0.194885	0.476741	0.679419
ENSG00000090339	ICAM1	-0.012947	0.281337	0.509396
ENSG00000090372	STRN4	-1.21258	0.140168	0.342293
ENSG00000090376	IRAK3	0.532173	0.00231147	0.0230336
ENSG00000090382	LYZ	-0.393421	0.58291	0.757667
ENSG00000090402	SI	-0.640186	0.997906	0.999336
ENSG00000090432	MUL1	0.48088	0.00675214	0.0487517
ENSG00000090447	TFAP4	-1.4407	0.0447553	0.170517
ENSG00000090470	PDCD7	-2.26081	6.99128e-05	0.00199297
ENSG00000090487	SPG21	-0.727795	0.297176	0.525965
ENSG00000090512	FETUB	-0.792414	0.953538	0.977914
ENSG00000090520	DNAJB11	-0.337577	0.107886	0.29256
ENSG00000090530	LEPREL1	-0.182762	0.04928	0.181949
ENSG00000090534	THPO	-0.733954	0.891647	0.946346
ENSG00000090539	CHRD	-0.323959	0.767276	0.872346
ENSG00000090554	FLT3LG	-0.160399	0.170261	0.38437
ENSG00000090565	RAB11FIP3	-1.33252	0.00528207	0.041006
ENSG00000090581	GNPTG	0.176179	0.000779825	0.0109646
ENSG00000090612	ZNF268	0.018081	0.322445	0.549952
ENSG00000090615	GOLGA3	-0.969295	0.244775	0.473142
ENSG00000090621	PABPC4	-1.03062	0.119454	0.311845
ENSG00000090659	CD209	-0.426173	0.703979	0.833818
ENSG00000090661	CERS4	-1.14574	0.0613089	0.208839
ENSG00000090674	MCOLN1	-0.653881	0.738709	0.855828
ENSG00000090686	USP48	-1.07671	0.0151278	0.0832509
ENSG00000090776	EFNB1	-0.334839	0.455096	0.662202
ENSG00000090857	PDPR	-0.46797	0.489387	0.689992
ENSG00000090861	AARS	-2.44311	8.38802e-06	0.000442121
ENSG00000090863	GLG1	-0.342195	0.218218	0.442971
ENSG00000090889	KIF4A	-1.5243	0.000163864	0.00365964
ENSG00000090905	TNRC6A	-0.580172	0.573954	0.751218
ENSG00000090920	FCGBP	-0.919691	0.0499185	0.18353
ENSG00000090924	PLEKHG2	-1.55936	0.054164	0.193613
ENSG00000090932	DLL3	-0.720307	0.196925	0.417086
ENSG00000090971	NAT14	-1.39243	0.00548714	0.0420943
ENSG00000090975	PITPNM2	-0.207234	0.313041	0.54123
ENSG00000090989	EXOC1	-1.79281	0.000133279	0.0031649
ENSG00000091009	RBM27	-1.39894	0.00119708	0.0148017
ENSG00000091010	POU4F3	-0.439161	0.551186	0.735319
ENSG00000091039	OSBPL8	0.282826	0.124732	0.320742
ENSG00000091073	DTX2	-0.0130236	0.283197	0.511134
ENSG00000091106	NLRC4	-0.112844	0.365666	0.589152
ENSG00000091127	PUS7	-1.03305	0.0881391	0.260165
ENSG00000091128	LAMB4	-0.402218	0.822952	0.905936
ENSG00000091129	NRCAM	-1.24516	0.0251341	0.117616
ENSG00000091136	LAMB1	-0.041646	0.0673104	0.220601
ENSG00000091137	SLC26A4	-0.211093	0.913199	0.95692
ENSG00000091138	SLC26A3	0.0490861	0.137997	0.339039
ENSG00000091140	DLD	-0.394237	0.959944	0.981336
ENSG00000091157	WDR7	-0.781068	0.12094	0.31435
ENSG00000091164	TXNL1	-0.287214	0.655572	0.807124
ENSG00000091181	IL5RA	-0.487223	0.881348	0.940581
ENSG00000091262	ABCC6	-0.948743	0.409661	0.627596
ENSG00000091317	CMTM6	0.0815892	0.00293304	0.0274349
ENSG00000091409	ITGA6	0.221861	0.126893	0.322338
ENSG00000091428	RAPGEF4	-0.68632	0.57468	0.751734
ENSG00000091482	SMPX	0.16595	0.00712522	0.0504627
ENSG00000091483	FH	-0.0109795	0.159145	0.368707
ENSG00000091490	SEL1L3	-1.12684	0.0258003	0.119594
ENSG00000091513	TF	-0.517483	0.887095	0.944273
ENSG00000091527	CDV3	-0.102497	0.162342	0.373459
ENSG00000091536	MYO15A	-0.65591	0.939796	0.971085
ENSG00000091542	ALKBH5	-0.902929	0.0848142	0.25468
ENSG00000091583	APOH	0.307615	0.104211	0.287225
ENSG00000091592	NLRP1	-0.110161	0.744376	0.859653
ENSG00000091622	PITPNM3	-0.842626	0.278151	0.506556
ENSG00000091640	SPAG7	-1.24074	0.00673046	0.048692
ENSG00000091651	ORC6	-2.26275	7.6678e-05	0.00213313
ENSG00000091656	ZFHX4	-0.526894	0.23101	0.457786
ENSG00000091664	SLC17A6	-0.305339	0.691141	0.826364
ENSG00000091704	CPA1	-0.200089	0.663946	0.812204
ENSG00000091732	ZC3HC1	-0.451378	0.507091	0.703578
ENSG00000091831	ESR1	-0.678157	0.0934404	0.269606
ENSG00000091844	RGS17	-0.33056	0.50246	0.700337
ENSG00000091879	ANGPT2	-0.56091	0.694969	0.82842
ENSG00000091947	TMEM101	-0.134807	0.642741	0.798323
ENSG00000091972	CD200	-0.940012	0.466128	0.67205
ENSG00000091986	CCDC80	0.0182604	0.0419012	0.163589
ENSG00000092009	CMA1	0.331176	0.00518582	0.0405011
ENSG00000092010	PSME1	-0.666354	0.774159	0.877152
ENSG00000092020	PPP2R3C	-1.0855	0.0438557	0.168361
ENSG00000092036	HAUS4	-0.878077	0.803465	0.893965
ENSG00000092051	JPH4	-0.859501	0.126279	0.321781
ENSG00000092054	MYH7	-0.699705	0.366339	0.589695
ENSG00000092067	CEBPE	-1.34627	0.071022	0.228408
ENSG00000092068	SLC7A8	-0.636884	0.411933	0.629473
ENSG00000092094	OSGEP	-1.29526	0.00195326	0.0206056
ENSG00000092096	SLC22A17	-0.128505	0.707486	0.836434
ENSG00000092098	RNF31	-1.57118	0.000342388	0.00614606
ENSG00000092108	SCFD1	-1.256	0.0554328	0.196257
ENSG00000092140	G2E3	-0.891447	0.0754145	0.236693
ENSG00000092148	HECTD1	0.0656886	0.177654	0.393326
ENSG00000092199	HNRNPC	-2.68491	4.20359e-06	0.000266071
ENSG00000092200	RPGRIP1	-0.465246	0.255026	0.4844
ENSG00000092201	SUPT16H	-1.6599	0.0103788	0.0648675
ENSG00000092203	TOX4	-0.860043	0.259653	0.48844
ENSG00000092208	GEMIN2	-1.0169	0.147912	0.353643
ENSG00000092295	TGM1	-0.0888101	0.418685	0.635248
ENSG00000092330	TINF2	-1.23446	0.212552	0.436853
ENSG00000092345	DAZL	0.497616	0.00275517	0.026177
ENSG00000092377	TBL1Y	0.837767	1.26824e-06	0.000121257
ENSG00000092421	SEMA6A	-0.740048	0.261188	0.490312
ENSG00000092439	TRPM7	-0.135918	0.419383	0.635578
ENSG00000092445	TYRO3	-1.2117	0.0145592	0.0814796
ENSG00000092470	WDR76	-0.469459	0.973667	0.988087
ENSG00000092529	CAPN3	-0.458569	0.893778	0.947033
ENSG00000092531	SNAP23	-0.819334	0.0473198	0.177579
ENSG00000092607	TBX15	-0.111994	0.492633	0.692017
ENSG00000092621	PHGDH	-0.965801	0.461504	0.667171
ENSG00000092758	COL9A3	-0.619537	0.207523	0.430302
ENSG00000092820	EZR	-0.822049	0.79148	0.887412
ENSG00000092841	MYL6	1.40591	2.65474e-06	0.000192135
ENSG00000092847	AGO1	-0.359993	0.363942	0.587569
ENSG00000092850	TEKT2	-1.16273	0.0167023	0.0890699
ENSG00000092853	CLSPN	-2.05495	1.14946e-05	0.000549504
ENSG00000092871	RFFL	-0.125482	0.557153	0.739579
ENSG00000092929	UNC13D	-0.913029	0.735754	0.854257
ENSG00000092931	MFSD11	-0.472355	0.962295	0.982578
ENSG00000092964	DPYSL2	-0.169117	0.720024	0.843432
ENSG00000092969	TGFB2	-0.130988	0.339146	0.564801
ENSG00000092978	GPATCH2	-0.120715	0.0737316	0.233728
ENSG00000093000	NUP50	-1.29286	0.0016804	0.0185343
ENSG00000093009	CDC45	-2.47837	3.58451e-05	0.00120586
ENSG00000093010	COMT	-0.253091	0.625009	0.786282
ENSG00000093072	CECR1	-0.0110223	0.0588958	0.203165
ENSG00000093144	ECHDC1	0.0164251	0.146018	0.350962
ENSG00000093167	LRRFIP2	0.380628	9.29965e-05	0.00245548
ENSG00000093183	SEC22C	-0.514163	0.84838	0.921365
ENSG00000093217	XYLB	-0.362824	0.832434	0.911897
ENSG00000094631	HDAC6	-1.04552	0.538614	0.727037
ENSG00000094755	GABRP	-0.793431	0.00807154	0.0546303
ENSG00000094796	KRT31	-0.5897	0.115731	0.305271
ENSG00000094804	CDC6	-1.88611	0.00538371	0.0415112
ENSG00000094841	UPRT	-0.214144	0.512606	0.707653
ENSG00000094880	CDC23	-2.39902	7.59858e-07	8.26562e-05
ENSG00000094914	AAAS	-0.736058	0.351124	0.575263
ENSG00000094916	CBX5	-1.07065	0.288317	0.517276
ENSG00000094963	FMO2	-0.263993	0.310462	0.538411
ENSG00000094975	SUCO	-0.974369	0.221598	0.446512
ENSG00000095002	MSH2	-1.05001	0.235681	0.463497
ENSG00000095015	MAP3K1	-0.118637	0.100403	0.281078
ENSG00000095059	DHPS	-1.75572	0.00207315	0.0214837
ENSG00000095066	HOOK2	-0.801322	0.234019	0.461627
ENSG00000095110	NXPE1	-0.316189	0.564794	0.744968
ENSG00000095139	ARCN1	-2.08803	0.00013467	0.00318959
ENSG00000095203	EPB41L4B	-0.379595	0.133392	0.332263
ENSG00000095209	TMEM38B	-0.70003	0.340486	0.565683
ENSG00000095261	PSMD5	-0.692004	0.3335	0.560543
ENSG00000095303	PTGS1	0.29537	0.0283787	0.127606
ENSG00000095319	NUP188	-1.82654	0.00185642	0.0199077
ENSG00000095321	CRAT	-0.716644	0.568141	0.747226
ENSG00000095370	SH2D3C	-0.765292	0.206672	0.429799
ENSG00000095380	NANS	-0.160947	0.51319	0.707975
ENSG00000095383	TBC1D2	-0.582409	0.820895	0.904933
ENSG00000095397	DFNB31	-0.318413	0.269758	0.499075
ENSG00000095464	PDE6C	-0.418411	0.662305	0.811454
ENSG00000095485	CWF19L1	-0.337292	0.23506	0.462896
ENSG00000095539	SEMA4G	-0.384067	0.168009	0.38122
[truncated: 16,167 more rows]
